# Supplementary material for: Collisional mechanics of the diagonal gaits of horses over a range of speeds
Source: PeerJ. 2019 Sep 17;7:e7689. doi: 10.7717/peerj.7689 (PMC6753918; doi:10.7717/peerj.7689)
Supplement: Data S1 [file peerj-07-7689-s001.xlsx]

## Sheet: Key to data
Worksheet Name		Variable Name		Variable Description						Units
Stats		Mass		Combined mass of horse, tack and rider						kg
		Effective limb length		Vertical limb length in standing						m
		Limb length		Resultant limb length in standing						m
		LF		Left Fore
		RF		Right fore
		LH		Left hind
		RH		Right Hind
Speed		SPEED LFRH		Mean speed LFRH diagonal step						m/s
		SPEED RFLH		Mean speed RFLH diagonal step						m/s
Collisions		COLLISION ANGLE LFRH		Collision angle Φ LFRH						radians
		COLLISION ANGLE RFLH		Collision angle Φ RFLH						radians
		MECH COST LFRH		CoMotmech LFRH						no units
		MECH COST RFLH		CoMotmech RFLH						no units
COM L		TRUNK_DISTANCE LFRH		Trunk COM excursion in the direction of motion LFRH						m
		TRUNK_DISTANCE RFLH		Trunk COM excursion in the direction of motion RFLH						m
COM V		TRUNK MAX LFRH		Maximum trunk COM height LFRH						m
		TRUNK MAX RFLH		Maximum trunk COM height RFLH						m
		TRUNK MIN LFRH		Minimum trunk COM height LFRH						m
		TRUNK MIN RFLH		Minimum trunk COM height RFLH						m
		TRUNK RANGE LFRH		COMv excursion LFRH						m
		TRUNK RANGE RFLH		COMv excursion RFLH						m
		TRUNK MEAN LFRH		Mean trunk COM height LFRH						m
		TRUNK MEAN RFLH		Mean trunk COM height RFLH						m
GRF VEC		VecMag		GRF vector magnitude per limb						N/kg
		VecAng		GRF vector angle per limb						deg
Limb angles		Max retraction		Maximum retraction angle in stance per limb						converted to degrees
		Max protraction		Maximum protraction angle in stance per limb						converted to degrees
		Range		Range of limb angle in stance per limb						converted to degrees
		Mean		Mean limb angle in stance per limb						converted to degrees
EFFECTIVE LL		Change in length		Change in vertical limb length from ON to minimum length per limb						mm
		Dif between min and standing (%)		Difference in vertical limb length to vertical standing length per limb						% difference
ABSOLUTE LL		Change in length		Change in resultant limb length from ON to minimum length per limb						mm
		Dif between min and standing (%)		Difference in resultant limb length to resultant standing length per limb						% difference
Import QQ		Import sheet for 2 horses' data		F = trial with X positive in the direction of motion
				B = trial with X negative in the direction of motion
Import T		Import sheet for 1 horses' data		F = trial with X positive in the direction of motion
				B = trial with X negative in the direction of motion
Cost graph		Data and graph for Figure 2								no units and m/s
Collisions Graphs		Data and graph for Figure 1								rad
GRF Graphs		Data and graph for Figure 1								N/kg
Height Graphs		Data and graph for Figure 1								mm compared to standing
Footfall timings		Data and bar charts of footfall patterns for each gait								time in seconds

## Sheet: STATS
			Effective limb length (m)				Limb length (m)
	Horse	Mass (inc. rider)	LF	RH	RF	LH	LF	RH	RF	LH
Quemacho	1	597
Trimmed_Static2.c3d 1			1.32464	1.31274	1.33416	1.27792	1.32507	1.31555	1.34588	1.29399
Trimmed_Quemacho_day2_static1.c3d Copy			1.34326	1.2833	1.35766	1.2961	1.34328	1.3005	1.35966	1.29816
Trimmed_Quemacho_day3_static1.c3d 1			1.33563	1.29937	1.34756	1.302	1.33563	1.30667	1.34778	1.302
Queba	2	612
Trimmed_Queba_day2_static1.c3d 1			1.34759	1.31184	1.35956	1.31199	1.34769	1.3216	1.3596	1.31618
Trimmed_Queba_day3_static2.c3d Copy			1.34949	1.32053	1.36876	1.28468	1.35088	1.32287	1.36912	1.30699
Trimmed_Queba_day4_pm_static1.c3d Copy			1.34864	1.3212	1.36083	1.29679	1.35079	1.32592	1.36271	1.30832
Tando	3	613	1.13719	1.28458	1.14594	1.26384	1.14064	1.28995	1.14843	1.26425

## Sheet: Speed
Per step HON to HON
SPEED LFRH					SPEED RFLH
File	Item	X			File	Item	X
Passage1.c3d	1	0.964244			Passage1.c3d	1	0.990375
Passage3.c3d	1	1.11982			Passage3.c3d	1	1.02472
-	2	1.00469			-	2	0.956168
Passage4.c3d	1	1.31037			Passage4.c3d	1	1.32889
-	2	1.20071			-	2	1.24452
Trot6.c3d	1	2.474			Trot6.c3d	1	2.46612
-	2	2.40367			Trot7.c3d	1	2.40129
Trot7.c3d	1	2.42153			Queba_day2_piaffe3.c3d	1	1.41464
-	2	2.30547			-	2	1.32411
Queba_day2_piaffe3.c3d	1	1.34211			Queba_day2_piaffe44.c3d	1	2.66911
Queba_day2_piaffe44.c3d	1	2.73571			Queba_day2_piaffe45.c3d	1	4.16053
Queba_day2_piaffe45.c3d	1	3.8171			Queba_day2_piaffe46.c3d	1	3.06681
Queba_day2_piaffe47.c3d	1	4.95091			Queba_day2_piaffe47.c3d	1	4.93702
Queba_day2_piaffe49.c3d	1	2.64537			Queba_day2_piaffe49.c3d	1	2.6494
Queba_day2_piaffe50.c3d	1	3.0953			-	2	2.62483
-	2	3.22501			Queba_day2_piaffe50.c3d	1	3.1711
Queba_day2_piaffe51.c3d	1	4.69252			Queba_day2_piaffe51.c3d	1	4.79316
Queba_day2_piaffe55.c3d	1	5.17851			Queba_day2_piaffe53.c3d	1	5.10177
Queba_day2_piaffe56.c3d	1	4.95173			Queba_day2_piaffe55.c3d	1	5.1001
Queba_day2_piaffe6.c3d	1	1.33766			Queba_day2_piaffe56.c3d	1	4.86209
Queba_day2_piaffe7.c3d	1	1.37578			Queba_day2_piaffe6.c3d	1	1.48814
-	2	1.26462			Queba_day2_piaffe7.c3d	1	1.40863
Quemacho_day2_walk10.c3d	1	-0.065907			-	2	1.37494
Quemacho_day2_walk12.c3d	1	2.48274			Quemacho_day2_walk10.c3d	1	-0.042337
Quemacho_day2_walk42.c3d	1	0.139587			-	2	-0.070387
-	2	0.113111			Quemacho_day2_walk12.c3d	1	2.42436
Quemacho_day2_walk49.c3d	1	3.21481			Quemacho_day2_walk42.c3d	1	0.184466
Quemacho_day2_walk50.c3d	1	3.41621			-	2	0.161804
Quemacho_day3_trot29.c3d	1	2.69214			Quemacho_day2_walk49.c3d	1	3.26435
-	2	2.75744			Quemacho_day2_walk50.c3d	1	3.48672
Quemacho_day3_trot31.c3d	1	2.48061			Quemacho_day3_trot29.c3d	1	2.74024
-	2	2.59249			Quemacho_day3_trot31.c3d	1	2.55248
Quemacho_day3_trot37.c3d	1	2.16074			Quemacho_day3_trot37.c3d	1	2.17387
-	2	2.17583			Quemacho_day3_trot40.c3d	1	2.3329
Quemacho_day3_trot40.c3d	1	2.29627			Quemacho_day3_trot42.c3d	1	2.22746
-	2	2.31702			-	2	2.22992
Quemacho_day3_trot42.c3d	1	2.21231			Quemacho_day3_trot43.c3d	1	2.19341
Quemacho_day3_trot43.c3d	1	2.17039			-	2	2.13607
-	2	2.1458			Queba_day3_trot12.c3d	1	2.52244
Queba_day3_trot12.c3d	1	2.45874			Queba_day3_trot13.c3d	1	2.39014
-	2	2.48231			Queba_day3_trot14.c3d	1	2.53473
Queba_day3_trot13.c3d	1	2.42952			Queba_day3_trot15.c3d	1	3.98275
Queba_day3_trot14.c3d	1	2.48058			Queba_day3_trot16.c3d	1	3.79517
-	2	2.49343			Queba_day3_trot21.c3d	1	4.12434
Queba_day3_trot15.c3d	1	4.02202			Queba_day3_trot23.c3d	1	3.15114
Queba_day3_trot16.c3d	1	3.6954			Queba_day3_trot24.c3d	1	3.35947
Queba_day3_trot21.c3d	1	3.87184			Queba_day3_trot26.c3d	1	3.27253
Queba_day3_trot23.c3d	1	3.20201			Queba_day3_trot27.c3d	1	3.58704
Queba_day3_trot24.c3d	1	3.2114			Queba_day3_trot28.c3d	1	2.86234
Queba_day3_trot26.c3d	1	3.30048			-	2	2.90635
Queba_day3_trot27.c3d	1	3.43609			Queba_day3_trot29.c3d	1	4.89449
-	2	3.61106			Queba_day3_trot6.c3d	1	2.6135
Queba_day3_trot28.c3d	1	2.89522			Queba_day3_trot7.c3d	1	2.51535
Queba_day3_trot29.c3d	1	4.71896			-	2	2.49606
Queba_day3_trot30.c3d	1	4.55197			Queba_Day4_passage10.c3d	1	-0.018402
Queba_day3_trot6.c3d	1	1.78564			-	2	-0.044933
-	2	2.19093			-	3	0.030841
Queba_day3_trot7.c3d	1	2.49172			Queba_Day4_piaffe11.c3d	1	0.350827
Queba_Day4_passage10.c3d	1	-0.054071			-	2	0.347783
-	2	0.019991			-	3	0.240581
-	3	0.098499			-	4	0.193966
Queba_Day4_piaffe11.c3d	1	0.342148			-	5	0.134544
-	2	0.276031			-	6	0.127514
-	3	0.280889			-	7	0.039626
-	4	0.119774			-	8	-0.01276
-	5	0.1524			Queba_Day4_piaffe3.c3d	1	0.212333
-	6	0.059646			-	2	0.304767
-	7	-0.004064			-	3	0.23558
-	8	0.040557			-	4	0.246276
Queba_Day4_piaffe3.c3d	1	0.251459			-	5	0.040916
-	2	0.267081			-	6	0.222575
-	3	0.205089			Queba_Day4_piaffe7.c3d	1	0.092239
-	4	0.300881			-	2	0.159513
-	5	0.055931			-	3	-0.010253
Queba_Day4_piaffe7.c3d	1	0.146458			tando_passage4.c3d	1	1.19034
-	2	0.076403			tando_piaffe10.c3d	1	0.370615
tando_piaffe10.c3d	1	0.336286			-	2	0.513286
-	2	0.425607				3	0.293643
-	3	0.514595			-	4	0.376902
-	4	0.383525			tando_piaffe15.c3d	1	1.26475
tando_piaffe13_2.c3d	1	1.20179			-	2	1.4049
tando_piaffe15.c3d	1	1.3681			tando_piaffe17.c3d	1	0.576268
-	2	1.26453			-	2	0.409153
tando_piaffe17.c3d	1	0.531397			tando_piaffe3.c3d	1	0.347083
	2	0.216192			-	2	0.408301
tando_piaffe3.c3d	1	0.40252			-	3	0.379728
-	2	0.32219			-	4	0.178726
-	3	0.381622			Tando_trot2s.c3d	1	3.7541
-	4	0.17949			Tando_trot3s.c3d	1	3.28185
Tando_trot2s.c3d	1	3.73256			Tando_trot4.c3d	1	3.29389
Tando_trot3s.c3d	1	3.31663			Tando_trot6s.c3d	1	3.03963
Tando_trot4.c3d	1	3.30406			-	2	2.95857
Tando_trot6s.c3d	1	3.0186			Tando_trot7s.c3d	1	3.22242
Tando_trot7s.c3d	1	3.18448			Tando_trot8s.c3d	1	2.55507

## Sheet: Collisions
Collisions are for the diagonal step HON to HON. N.B. Data is removed where there is no ground contact as the collision is zero in flight
COLLISION ANGLE LFRH				COLLISION ANGLE RFLH				MECH COST LFRH				MECH COST RFLH
File	Item	X		File	Item	X		File	Item	X		File	Item	X
Passage1.c3d	1	0.3446		Passage1.c3d	1	0.339176		Passage1.c3d	1	0.334709		Passage1.c3d	1	0.339299
Passage3.c3d	1	0.369147		Passage3.c3d	1	0.384117		Passage3.c3d	1	0.343254		Passage3.c3d	1	0.380613
-	2	0.38476		-	2	0.38136		-	2	0.376534		-	2	0.38615
Passage4.c3d	1	0.31915		Passage4.c3d	1	0.409324		Passage4.c3d	1	0.28116		Passage4.c3d	1	0.359726
-	2	0.383418		-	2	0.291339		-	2	0.338627		-	2	0.272264
Trot6.c3d	1	0.271251		Trot6.c3d	1	0.258198		Trot6.c3d	1	0.192539		Trot6.c3d	1	0.187973
-	2	0.262872		Trot7.c3d	1	0.254658		-	2	0.203549		Trot7.c3d	1	0.19739
Trot7.c3d	1	0.256895		Queba_day2_piaffe3.c3d	1	0.372199		Trot7.c3d	1	0.207811		Queba_day2_piaffe3.c3d	1	0.349072
-	2	0.263234		-	2	0.416102		-	2	0.210633		-	2	0.375403
Queba_day2_piaffe3.c3d	1	0.413685		Queba_day2_piaffe44.c3d	1	0.276813		Queba_day2_piaffe3.c3d	1	0.354751		Queba_day2_piaffe44.c3d	1	0.217729
Queba_day2_piaffe44.c3d	1	0.273001		Queba_day2_piaffe45.c3d	1	0.244753		Queba_day2_piaffe44.c3d	1	0.201925		Queba_day2_piaffe45.c3d	1	0.168473
Queba_day2_piaffe45.c3d	1	0.229842		Queba_day2_piaffe46.c3d	1	0.240529		Queba_day2_piaffe45.c3d	1	0.177677		Queba_day2_piaffe46.c3d	1	0.182879
Queba_day2_piaffe47.c3d	1	0.259308		Queba_day2_piaffe47.c3d	1	0.267213		Queba_day2_piaffe47.c3d	1	0.196088		Queba_day2_piaffe47.c3d	1	0.176443
Queba_day2_piaffe49.c3d	1	0.299872		Queba_day2_piaffe49.c3d	1	0.279737		Queba_day2_piaffe49.c3d	1	0.223238		Queba_day2_piaffe49.c3d	1	0.202793
Queba_day2_piaffe50.c3d	1	0.272129		-	2	0.298634		Queba_day2_piaffe50.c3d	1	0.206131		-	2	0.219955
-	2	0.334484		Queba_day2_piaffe50.c3d	1	0.296728		-	2	0.236232		Queba_day2_piaffe50.c3d	1	0.193867
Queba_day2_piaffe51.c3d	1	0.272176		Queba_day2_piaffe51.c3d	1	0.258786		Queba_day2_piaffe51.c3d	1	0.174469		Queba_day2_piaffe51.c3d	1	0.180164
Queba_day2_piaffe55.c3d	1	0.267511		Queba_day2_piaffe53.c3d	1	0.25464		Queba_day2_piaffe55.c3d	1	0.179607		Queba_day2_piaffe53.c3d	1	0.175987
Queba_day2_piaffe56.c3d	1	0.286209		Queba_day2_piaffe55.c3d	1	0.258602		Queba_day2_piaffe56.c3d	1	0.174146		Queba_day2_piaffe55.c3d	1	0.188093
Queba_day2_piaffe6.c3d	1	0.436672		Queba_day2_piaffe56.c3d	1	0.253167		Queba_day2_piaffe6.c3d	1	0.394425		Queba_day2_piaffe56.c3d	1	0.193402
Queba_day2_piaffe7.c3d	1	0.388928		Queba_day2_piaffe6.c3d	1	0.446883		Queba_day2_piaffe7.c3d	1	0.345221		Queba_day2_piaffe6.c3d	1	0.354106
-	2	0.38822		Queba_day2_piaffe7.c3d	1	0.440873		-	2	0.351677		Queba_day2_piaffe7.c3d	1	0.379551
Quemacho_day2_walk10.c3d	1	1.1019		-	2	0.399679		Quemacho_day2_walk10.c3d	1	0.890773		-	2	0.352875
Quemacho_day2_walk12.c3d	1	0.248145		Quemacho_day2_walk10.c3d	1	1.03784		Quemacho_day2_walk12.c3d	1	0.201684		Quemacho_day2_walk10.c3d	1	0.874439
Quemacho_day2_walk42.c3d	1	0.886999		-	2	1.03382		Quemacho_day2_walk42.c3d	1	0.879351		-	2	0.86869
-	2	0.937989		Quemacho_day2_walk12.c3d	1	0.253976		-	2	0.831136		Quemacho_day2_walk12.c3d	1	0.210749
Quemacho_day2_walk49.c3d	1	0.381658		Quemacho_day2_walk42.c3d	1	0.859782		Quemacho_day2_walk49.c3d	1	0.250252		Quemacho_day2_walk42.c3d	1	0.758636
Quemacho_day2_walk50.c3d	1	0.347077		-	2	0.799589		Quemacho_day2_walk50.c3d	1	0.26078		-	2	0.73783
Quemacho_day3_trot29.c3d	1	0.263572		Quemacho_day2_walk49.c3d	1	0.349744		Quemacho_day3_trot29.c3d	1	0.202561		Quemacho_day2_walk49.c3d	1	0.260788
-	2	0.259648		Quemacho_day2_walk50.c3d	1	0.323032		-	2	0.203017		Quemacho_day2_walk50.c3d	1	0.232921
Quemacho_day3_trot31.c3d	1	0.247533		Quemacho_day3_trot29.c3d	1	0.259289		Quemacho_day3_trot31.c3d	1	0.200931		Quemacho_day3_trot29.c3d	1	0.203616
-	2	0.251833		Quemacho_day3_trot31.c3d	1	0.238362		-	2	0.194738		Quemacho_day3_trot31.c3d	1	0.19503
Quemacho_day3_trot37.c3d	1	0.286172		Quemacho_day3_trot37.c3d	1	0.281956		Quemacho_day3_trot37.c3d	1	0.231137		Quemacho_day3_trot37.c3d	1	0.231007
-	2	0.266636		Quemacho_day3_trot40.c3d	1	0.261185		-	2	0.217212		Quemacho_day3_trot40.c3d	1	0.205522
Quemacho_day3_trot40.c3d	1	0.252509		Quemacho_day3_trot42.c3d	1	0.282345		Quemacho_day3_trot40.c3d	1	0.204739		Quemacho_day3_trot42.c3d	1	0.234538
-	2	0.264917		-	2	0.29547		-	2	0.210164		-	2	0.228989
Quemacho_day3_trot42.c3d	1	0.269987		Quemacho_day3_trot43.c3d	1	0.269839		Quemacho_day3_trot42.c3d	1	0.220007		Quemacho_day3_trot43.c3d	1	0.215085
Quemacho_day3_trot43.c3d	1	0.259888		-	2	0.273411		Quemacho_day3_trot43.c3d	1	0.217685		-	2	0.218133
-	2	0.260329		Queba_day3_trot12.c3d	1	0.285684		-	2	0.204679		Queba_day3_trot12.c3d	1	0.229934
Queba_day3_trot12.c3d	1	0.297778		Queba_day3_trot13.c3d	1	0.287605		Queba_day3_trot12.c3d	1	0.263855		Queba_day3_trot13.c3d	1	0.231278
-	2	0.310886		Queba_day3_trot14.c3d	1	0.262426		-	2	0.240181		Queba_day3_trot14.c3d	1	0.210525
Queba_day3_trot13.c3d	1	0.294014		Queba_day3_trot15.c3d	1	0.260323		Queba_day3_trot13.c3d	1	0.243452		Queba_day3_trot15.c3d	1	0.184449
Queba_day3_trot14.c3d	1	0.300444		Queba_day3_trot16.c3d	1	0.251546		Queba_day3_trot14.c3d	1	0.249432		Queba_day3_trot16.c3d	1	0.186129
-	2	0.301518		Queba_day3_trot21.c3d	1	0.230263		-	2	0.249321		Queba_day3_trot21.c3d	1	0.175936
Queba_day3_trot15.c3d	1	0.288025		Queba_day3_trot23.c3d	1	0.249768		Queba_day3_trot15.c3d	1	0.201391		Queba_day3_trot23.c3d	1	0.203221
Queba_day3_trot16.c3d	1	0.267307		Queba_day3_trot24.c3d	1	0.279798		Queba_day3_trot16.c3d	1	0.202512		Queba_day3_trot24.c3d	1	0.193686
Queba_day3_trot21.c3d	1	0.265774		Queba_day3_trot26.c3d	1	0.249554		Queba_day3_trot21.c3d	1	0.190362		Queba_day3_trot26.c3d	1	0.187775
Queba_day3_trot23.c3d	1	0.256759		Queba_day3_trot27.c3d	1	0.259583		Queba_day3_trot23.c3d	1	0.203279		Queba_day3_trot27.c3d	1	0.187051
Queba_day3_trot24.c3d	1	0.248313		Queba_day3_trot28.c3d	1	0.258799		Queba_day3_trot24.c3d	1	0.201817		Queba_day3_trot28.c3d	1	0.214276
Queba_day3_trot26.c3d	1	0.286617		-	2	0.283296		Queba_day3_trot26.c3d	1	0.199863		-	2	0.206946
Queba_day3_trot27.c3d	1	0.244673		Queba_day3_trot29.c3d	1	0.260431		Queba_day3_trot27.c3d	1	0.200277		Queba_day3_trot29.c3d	1	0.201583
-	2	0.267917		Queba_day3_trot6.c3d	1	0.267193		-	2	0.212328		Queba_day3_trot6.c3d	1	0.231973
Queba_day3_trot28.c3d	1	0.249947		Queba_day3_trot7.c3d	1	0.284622		Queba_day3_trot28.c3d	1	0.2004		Queba_day3_trot7.c3d	1	0.244263
Queba_day3_trot29.c3d	1	0.262823		-	2	0.292214		Queba_day3_trot29.c3d	1	0.177653		-	2	0.233628
Queba_day3_trot30.c3d	1	0.249564		Queba_Day4_passage10.c3d	1	1.38763		Queba_day3_trot30.c3d	1	0.178057		Queba_Day4_passage10.c3d	1	0.990727
Queba_day3_trot6.c3d	1	0.456538		-	2	1.28747		Queba_day3_trot6.c3d	1	0.263714		-	2	0.972867
-	2	0.317739		-	3	1.295		-	2	0.25892		-	3	0.971177
Queba_day3_trot7.c3d	1	0.282114		Queba_Day4_piaffe11.c3d	1	0.74412		Queba_day3_trot7.c3d	1	0.225034		Queba_Day4_piaffe11.c3d	1	0.692172
Queba_Day4_passage10.c3d	1	1.42377		-	2	0.666968		Queba_Day4_passage10.c3d	1	0.988303		-	2	0.640319
-	2	1.37357		-	3	0.876785		-	2	0.979255		-	3	0.753068
-	3	1.16435		-	4	0.837904		-	3	0.92532		-	4	0.764392
Queba_Day4_piaffe11.c3d	1	0.832847		-	5	1.08845		Queba_Day4_piaffe11.c3d	1	0.708062		-	5	0.858814
-	2	0.769197		-	6	0.970261		-	2	0.698899		-	6	0.839677
-	3	0.799562		-	7	1.2594		-	3	0.678123		-	7	0.962807
-	4	1.15792		-	8	1.41755		-	4	0.934365		-	8	0.993972
-	5	1.02807		Queba_Day4_piaffe3.c3d	1	0.74658		-	5	0.787095		Queba_Day4_piaffe3.c3d	1	0.682021
-	6	1.28521		-	2	0.529667		-	6	0.959546		-	2	0.512478
-	7	1.40298		-	3	0.812162		-	7	0.989588		-	3	0.72545
-	8	1.2908		-	4	0.788982		-	8	0.962901		-	4	0.735494
Queba_Day4_piaffe3.c3d	1	0.616399		-	5	1.21126		Queba_Day4_piaffe3.c3d	1	0.587288		-	5	0.952939
-	2	0.747754		-	6	0.687926		-	2	0.68241		-	6	0.620943
-	3	0.932578		Queba_Day4_piaffe7.c3d	1	1.07531		-	3	0.801985		Queba_Day4_piaffe7.c3d	1	0.867358
-	4	0.852254		-	2	0.969278		-	4	0.72602		-	2	0.818229
-	5	1.30431		-	3	1.44794		-	5	0.968314		-	3	0.992728
Queba_Day4_piaffe7.c3d	1	0.941036		tando_passage4.c3d	1	0.419167		Queba_Day4_piaffe7.c3d	1	0.820263		tando_passage4.c3d	1	0.377663
-	2	1.16568		tando_piaffe10.c3d	1	0.440138		-	2	0.897032		tando_piaffe10.c3d	1	0.436433
tando_piaffe10.c3d	1	0.582619		-	2	0.381376		tando_piaffe10.c3d	1	0.516824		-	2	0.375444
-	2	0.447755			3	0.462953		-	2	0.436593			3	0.453262
-	3	0.490495		-	4	0.286157		-	3	0.477477		-	4	0.268674
-	4	0.418453		tando_piaffe15.c3d	1	0.344931		-	4	0.398332		tando_piaffe15.c3d	1	0.324516
tando_piaffe13_2.c3d	1	0.345741		-	2	0.332806		tando_piaffe13_2.c3d	1	0.323841		-	2	0.323702
tando_piaffe15.c3d	1	0.333489		tando_piaffe17.c3d	1	0.364998		tando_piaffe15.c3d	1	0.296974		tando_piaffe17.c3d	1	0.323701
-	2	0.332959		-	2	0.309934		-	2	0.318484		-	2	0.295557
tando_piaffe17.c3d	1	0.335868		tando_piaffe3.c3d	1	0.537276		tando_piaffe17.c3d	1	0.319662		tando_piaffe3.c3d	1	0.523421
	2	0.487636		-	2	0.349463			2	0.295557		-	2	0.335083
tando_piaffe3.c3d	1	0.576754		-	3	0.490581		tando_piaffe3.c3d	1	0.542945		-	3	0.477507
-	2	0.567126		-	4	0.708582		-	2	0.514145		-	4	0.666731
-	3	0.484461		Tando_trot2s.c3d	1	0.259474		-	3	0.474735		Tando_trot2s.c3d	1	0.18717
-	4	0.806023		Tando_trot3s.c3d	1	0.256216		-	4	0.675276		Tando_trot3s.c3d	1	0.183478
Tando_trot2s.c3d	1	0.249908		Tando_trot4.c3d	1	0.270085		Tando_trot2s.c3d	1	0.177235		Tando_trot4.c3d	1	0.194524
Tando_trot3s.c3d	1	0.26086		Tando_trot6s.c3d	1	0.261265		Tando_trot3s.c3d	1	0.19907		Tando_trot6s.c3d	1	0.1939
Tando_trot4.c3d	1	0.262139		-	2	0.256049		Tando_trot4.c3d	1	0.193313		-	2	0.187373
Tando_trot6s.c3d	1	0.255		Tando_trot7s.c3d	1	0.252083		Tando_trot6s.c3d	1	0.194039		Tando_trot7s.c3d	1	0.179649
Tando_trot7s.c3d	1	0.253184		Tando_trot8s.c3d	1	0.260013		Tando_trot7s.c3d	1	0.193559		Tando_trot8s.c3d	1	0.203501

## Sheet: COM L
Values are for each step HON to HON
TRUNK_DISTANCE LFRH				TRUNK_DISTANCE RFLH
File	Item	X		File	Item	X
Passage1.c3d	1	0.489283		Passage1.c3d	1	0.511323
Passage3.c3d	1	0.558961		Passage3.c3d	1	0.553899
-	2	0.501636		-	2	0.517543
Passage4.c3d	1	0.632441		Passage4.c3d	1	0.686048
-	2	0.6304		-	2	0.611868
Trot6.c3d	1	0.927084		Trot6.c3d	1	0.965609
-	2	0.940732		Trot7.c3d	1	0.960058
Trot7.c3d	1	0.907339		Queba_day2_piaffe3.c3d	1	0.765958
-	2	0.883111		-	2	0.694802
Queba_day2_piaffe3.c3d	1	0.748488		Queba_day2_piaffe44.c3d	1	1.15618
Queba_day2_piaffe44.c3d	1	1.09398		Queba_day2_piaffe45.c3d	1	1.59506
Queba_day2_piaffe45.c3d	1	1.30402		Queba_day2_piaffe46.c3d	1	1.22609
Queba_day2_piaffe47.c3d	1	1.6005		Queba_day2_piaffe47.c3d	1	1.72743
Queba_day2_piaffe49.c3d	1	1.03521		Queba_day2_piaffe49.c3d	1	1.10342
Queba_day2_piaffe50.c3d	1	1.18574		-	2	1.11517
-	2	1.18007		Queba_day2_piaffe50.c3d	1	1.21529
Queba_day2_piaffe51.c3d	1	1.68081		Queba_day2_piaffe51.c3d	1	1.5912
Queba_day2_piaffe55.c3d	1	1.71794		Queba_day2_piaffe53.c3d	1	1.78527
Queba_day2_piaffe56.c3d	1	1.81516		Queba_day2_piaffe55.c3d	1	1.86982
Queba_day2_piaffe6.c3d	1	0.69037		Queba_day2_piaffe56.c3d	1	1.70182
Queba_day2_piaffe7.c3d	1	0.744726		Queba_day2_piaffe6.c3d	1	0.805872
-	2	0.695069		Queba_day2_piaffe7.c3d	1	0.727726
Quemacho_day2_walk10.c3d	1	-0.039654		-	2	0.687134
Quemacho_day2_walk12.c3d	1	0.95102		Quemacho_day2_walk10.c3d	1	-0.014555
Quemacho_day2_walk42.c3d	1	0.090506		-	2	-0.025159
-	2	0.062129		Quemacho_day2_walk12.c3d	1	0.989917
Quemacho_day2_walk49.c3d	1	1.25903		Quemacho_day2_walk42.c3d	1	0.095169
Quemacho_day2_walk50.c3d	1	1.36637		-	2	0.079317
Quemacho_day3_trot29.c3d	1	0.98598		Quemacho_day2_walk49.c3d	1	1.36041
-	2	1.01053		Quemacho_day2_walk50.c3d	1	1.36608
Quemacho_day3_trot31.c3d	1	0.949769		Quemacho_day3_trot29.c3d	1	1.07258
-	2	1.01496		Quemacho_day3_trot31.c3d	1	0.977707
Quemacho_day3_trot37.c3d	1	0.881491		Quemacho_day3_trot37.c3d	1	0.941328
-	2	0.887788		Quemacho_day3_trot40.c3d	1	0.932661
Quemacho_day3_trot40.c3d	1	0.898062		Quemacho_day3_trot42.c3d	1	0.927306
-	2	0.965085		-	2	0.965941
Quemacho_day3_trot42.c3d	1	0.884094		Quemacho_day3_trot43.c3d	1	0.894991
Quemacho_day3_trot43.c3d	1	0.867208		-	2	0.871975
-	2	0.857455		Queba_day3_trot12.c3d	1	1.03002
Queba_day3_trot12.c3d	1	1.06486		Queba_day3_trot13.c3d	1	1.05519
-	2	1.07515		Queba_day3_trot14.c3d	1	1.03455
Queba_day3_trot13.c3d	1	1.05212		Queba_day3_trot15.c3d	1	1.45998
Queba_day3_trot14.c3d	1	1.01204		Queba_day3_trot16.c3d	1	1.38461
-	2	1.03052		Queba_day3_trot21.c3d	1	1.64028
Queba_day3_trot15.c3d	1	1.40704		Queba_day3_trot23.c3d	1	1.23393
Queba_day3_trot16.c3d	1	1.29286		Queba_day3_trot24.c3d	1	1.34351
Queba_day3_trot21.c3d	1	1.45151		Queba_day3_trot26.c3d	1	1.22687
Queba_day3_trot23.c3d	1	1.14695		Queba_day3_trot27.c3d	1	1.40475
Queba_day3_trot24.c3d	1	1.15003		Queba_day3_trot28.c3d	1	1.1207
Queba_day3_trot26.c3d	1	1.1823		-	2	1.11374
Queba_day3_trot27.c3d	1	1.2022		Queba_day3_trot29.c3d	1	1.79471
-	2	1.23377		Queba_day3_trot6.c3d	1	1.14768
Queba_day3_trot28.c3d	1	1.10923		Queba_day3_trot7.c3d	1	1.04785
Queba_day3_trot29.c3d	1	1.73077		-	2	1.06043
Queba_day3_trot30.c3d	1	1.70688		Queba_Day4_passage10.c3d	1	-0.010614
Queba_day3_trot6.c3d	1	0.756539		-	2	-0.025683
-	2	1.0036		-	3	0.018796
Queba_day3_trot7.c3d	1	1.01699		Queba_Day4_piaffe11.c3d	1	0.205005
Queba_Day4_passage10.c3d	1	-0.025467		-	2	0.191763
-	2	0.009275		-	3	0.376195
-	3	0.05239		-	4	0.100502
Queba_Day4_piaffe11.c3d	1	0.151187		-	5	0.068497
-	2	0.15848		-	6	0.071396
-	3	0.114857		-	7	0.02165
-	4	0.057999		-	8	-0.007055
-	5	0.489264		Queba_Day4_piaffe3.c3d	1	0.102496
-	6	0.031468		-	2	0.142135
-	7	-0.001779		-	3	0.12741
-	8	0.019436		-	4	0.147925
Queba_Day4_piaffe3.c3d	1	0.154807		-	5	0.022813
-	2	0.149002		-	6	0.120403
-	3	0.104274		Queba_Day4_piaffe7.c3d	1	0.049216
-	4	0.145611		-	2	0.085154
-	5	0.029599		-	3	-0.005548
Queba_Day4_piaffe7.c3d	1	0.083786		tando_passage4.c3d	1	0.535003
-	2	0.040463		tando_piaffe10.c3d	1	0.209756
tando_piaffe10.c3d	1	0.153736		-	2	0.286095
-	2	0.184328		-	3	0.12869
-	3	0.282947		-	4	0.17868
-	4	0.207824		tando_piaffe15.c3d	1	0.694921
tando_piaffe13_2.c3d	1	0.540585		-	2	0.78372
tando_piaffe15.c3d	1	0.702599		tando_piaffe17.c3d	1	0.19643
-	2	0.68394		-	2	1.09443
tando_piaffe17.c3d	1	0.224758		tando_piaffe3.c3d	1	0.173486
-	2	0.111902		-	2	0.193371
tando_piaffe3.c3d	1	0.180654		-	3	0.199141
-	2	0.155158		-	4	0.086012
-	3	0.180861		Tando_trot2s.c3d	1	1.18917
-	4	0.09205		Tando_trot3s.c3d	1	1.17597
Tando_trot2s.c3d	1	1.24469		Tando_trot4.c3d	1	1.15307
Tando_trot3s.c3d	1	1.1885		Tando_trot6s.c3d	1	1.11445
Tando_trot4.c3d	1	1.15669		-	2	1.13402
Tando_trot6s.c3d	1	1.13235		Tando_trot7s.c3d	1	1.12818
Tando_trot7s.c3d	1	1.14131		Tando_trot8s.c3d	1	1.04316

## Sheet: COM V
Values are for each step HON to HON
TRUNK MAX LFRH				TRUNK MAX RFLH				TRUNK MIN LFRH				TRUNK MIN RFLH				TRUNK RANGE LFRH			TRUNK RANGE RFLH			TRUNK MEAN LFRH				TRUNK MEAN RFLH
File	Item	Z		File	Item	Z		File	Item	Z		File	Item	Z								File	Item	Z		File	Item	Z
Passage1.c3d	1	1.36555		Passage1.c3d	1	1.36484		Passage1.c3d	1	1.28493		Passage1.c3d	1	1.2766		0.080617			0.088239			Passage1.c3d	1	1.32286		Passage1.c3d	1	1.3197
Passage3.c3d	1	1.38322		Passage3.c3d	1	1.38309		Passage3.c3d	1	1.27744		Passage3.c3d	1	1.26929		0.10578			0.113797			Passage3.c3d	1	1.32375		Passage3.c3d	1	1.32216
-	2	1.37021		-	2	1.37021		-	2	1.26321		-	2	1.25899		0.106998			0.111218			-	2	1.31081		-	2	1.31264
Passage4.c3d	1	1.35526		Passage4.c3d	1	1.36503		Passage4.c3d	1	1.24234		Passage4.c3d	1	1.23896		0.112924			0.126072			Passage4.c3d	1	1.28699		Passage4.c3d	1	1.30091
-	2	1.35987		-	2	1.35218		-	2	1.24259		-	2	1.27614		0.117284			0.07604			-	2	1.29686		-	2	1.31342
Trot6.c3d	1	1.33429		Trot6.c3d	1	1.33501		Trot6.c3d	1	1.27097		Trot6.c3d	1	1.2756		0.063319			0.05941			Trot6.c3d	1	1.29712		Trot6.c3d	1	1.30173
-	2	1.34034		Trot7.c3d	1	1.33399		-	2	1.27615		Trot7.c3d	1	1.2771		0.064187			0.056887			-	2	1.30551		Trot7.c3d	1	1.30436
Trot7.c3d	1	1.33415		Queba_day2_piaffe3.c3d	1	1.36863		Trot7.c3d	1	1.27176		Queba_day2_piaffe3.c3d	1	1.24332		0.062385			0.125307			Trot7.c3d	1	1.29994		Queba_day2_piaffe3.c3d	1	1.30453
-	2	1.33696		-	2	1.36853		-	2	1.27528		-	2	1.24369		0.061678			0.124838			-	2	1.30296		-	2	1.3027
Queba_day2_piaffe3.c3d	1	1.39373		Queba_day2_piaffe44.c3d	1	1.3456		Queba_day2_piaffe3.c3d	1	1.25097		Queba_day2_piaffe44.c3d	1	1.25717		0.142756			0.088433			Queba_day2_piaffe3.c3d	1	1.31943		Queba_day2_piaffe44.c3d	1	1.29724
Queba_day2_piaffe44.c3d	1	1.33038		Queba_day2_piaffe45.c3d	1	1.2844		Queba_day2_piaffe44.c3d	1	1.2513		Queba_day2_piaffe45.c3d	1	1.20507		0.079088			0.079326			Queba_day2_piaffe44.c3d	1	1.28659		Queba_day2_piaffe45.c3d	1	1.24531
Queba_day2_piaffe45.c3d	1	1.31221		Queba_day2_piaffe46.c3d	1	1.3253		Queba_day2_piaffe45.c3d	1	1.221		Queba_day2_piaffe46.c3d	1	1.25348		0.091211			0.071826			Queba_day2_piaffe45.c3d	1	1.25678		Queba_day2_piaffe46.c3d	1	1.28863
Queba_day2_piaffe47.c3d	1	1.29676		Queba_day2_piaffe47.c3d	1	1.28962		Queba_day2_piaffe47.c3d	1	1.20376		Queba_day2_piaffe47.c3d	1	1.21709		0.093			0.072526			Queba_day2_piaffe47.c3d	1	1.24583		Queba_day2_piaffe47.c3d	1	1.25358
Queba_day2_piaffe49.c3d	1	1.32763		Queba_day2_piaffe49.c3d	1	1.34		Queba_day2_piaffe49.c3d	1	1.25248		Queba_day2_piaffe49.c3d	1	1.26832		0.075155			0.071682			Queba_day2_piaffe49.c3d	1	1.28828		Queba_day2_piaffe49.c3d	1	1.30297
Queba_day2_piaffe50.c3d	1	1.31682		-	2	1.36131		Queba_day2_piaffe50.c3d	1	1.24023		-	2	1.25532		0.076592			0.105991			Queba_day2_piaffe50.c3d	1	1.27653		-	2	1.29906
-	2	1.33564		Queba_day2_piaffe50.c3d	1	1.32953		-	2	1.24146		Queba_day2_piaffe50.c3d	1	1.24574		0.094182			0.083783			-	2	1.28549		Queba_day2_piaffe50.c3d	1	1.28403
Queba_day2_piaffe51.c3d	1	1.29552		Queba_day2_piaffe51.c3d	1	1.30788		Queba_day2_piaffe51.c3d	1	1.21195		Queba_day2_piaffe51.c3d	1	1.21885		0.083572			0.089037			Queba_day2_piaffe51.c3d	1	1.24836		Queba_day2_piaffe51.c3d	1	1.2582
Queba_day2_piaffe55.c3d	1	1.29453		Queba_day2_piaffe53.c3d	1	1.28796		Queba_day2_piaffe55.c3d	1	1.20937		Queba_day2_piaffe53.c3d	1	1.20642		0.085158			0.081541			Queba_day2_piaffe55.c3d	1	1.24909		Queba_day2_piaffe53.c3d	1	1.24641
Queba_day2_piaffe56.c3d	1	1.30713		Queba_day2_piaffe55.c3d	1	1.29489		Queba_day2_piaffe56.c3d	1	1.21651		Queba_day2_piaffe55.c3d	1	1.20117		0.090621			0.093718			Queba_day2_piaffe56.c3d	1	1.25966		Queba_day2_piaffe55.c3d	1	1.24759
Queba_day2_piaffe6.c3d	1	1.38309		Queba_day2_piaffe56.c3d	1	1.2938		Queba_day2_piaffe6.c3d	1	1.24372		Queba_day2_piaffe56.c3d	1	1.2021		0.139371			0.091697			Queba_day2_piaffe6.c3d	1	1.31053		Queba_day2_piaffe56.c3d	1	1.25273
Queba_day2_piaffe7.c3d	1	1.38126		Queba_day2_piaffe6.c3d	1	1.3856		Queba_day2_piaffe7.c3d	1	1.2598		Queba_day2_piaffe6.c3d	1	1.25951		0.121452			0.126097			Queba_day2_piaffe7.c3d	1	1.31814		Queba_day2_piaffe6.c3d	1	1.32422
-	2	1.38158		Queba_day2_piaffe7.c3d	1	1.3787		-	2	1.26215		Queba_day2_piaffe7.c3d	1	1.2443		0.119427			0.1344			-	2	1.31963		Queba_day2_piaffe7.c3d	1	1.31055
Quemacho_day2_walk10.c3d	1	1.37508		-	2	1.37232		Quemacho_day2_walk10.c3d	1	1.33861		-	2	1.25629		0.036474			0.116035			Quemacho_day2_walk10.c3d	1	1.356		-	2	1.31339
Quemacho_day2_walk12.c3d	1	1.358		Quemacho_day2_walk10.c3d	1	1.37099		Quemacho_day2_walk12.c3d	1	1.29746		Quemacho_day2_walk10.c3d	1	1.3457		0.060535			0.025298			Quemacho_day2_walk12.c3d	1	1.32468		Quemacho_day2_walk10.c3d	1	1.35733
Quemacho_day2_walk42.c3d	1	1.4064		-	2	1.37816		Quemacho_day2_walk42.c3d	1	1.32382		-	2	1.33629		0.082578			0.041863			Quemacho_day2_walk42.c3d	1	1.36613		-	2	1.35966
-	2	1.39044		Quemacho_day2_walk12.c3d	1	1.36417		-	2	1.33532		Quemacho_day2_walk12.c3d	1	1.29971		0.055112			0.064455			-	2	1.36044		Quemacho_day2_walk12.c3d	1	1.3298
Quemacho_day2_walk49.c3d	1	1.40996		Quemacho_day2_walk42.c3d	1	1.39297		Quemacho_day2_walk49.c3d	1	1.27662		Quemacho_day2_walk42.c3d	1	1.3265		0.133343			0.066474			Quemacho_day2_walk49.c3d	1	1.33677		Quemacho_day2_walk42.c3d	1	1.35471
Quemacho_day2_walk50.c3d	1	1.4095		-	2	1.38425		Quemacho_day2_walk50.c3d	1	1.27268		-	2	1.32955		0.136825			0.054699			Quemacho_day2_walk50.c3d	1	1.33765		-	2	1.35316
Quemacho_day3_trot29.c3d	1	1.35609		Quemacho_day2_walk49.c3d	1	1.39477		Quemacho_day3_trot29.c3d	1	1.29284		Quemacho_day2_walk49.c3d	1	1.27696		0.063249			0.117812			Quemacho_day3_trot29.c3d	1	1.32118		Quemacho_day2_walk49.c3d	1	1.33792
-	2	1.35936		Quemacho_day2_walk50.c3d	1	1.39505		-	2	1.28982		Quemacho_day2_walk50.c3d	1	1.2883		0.069537			0.106753			-	2	1.31885		Quemacho_day2_walk50.c3d	1	1.34345
Quemacho_day3_trot31.c3d	1	1.35151		Quemacho_day3_trot29.c3d	1	1.35119		Quemacho_day3_trot31.c3d	1	1.29225		Quemacho_day3_trot29.c3d	1	1.29022		0.059259			0.060962			Quemacho_day3_trot31.c3d	1	1.31995		Quemacho_day3_trot29.c3d	1	1.31939
-	2	1.35755		Quemacho_day3_trot31.c3d	1	1.35092		-	2	1.29211		Quemacho_day3_trot31.c3d	1	1.29262		0.065443			0.058301			-	2	1.32054		Quemacho_day3_trot31.c3d	1	1.31879
Quemacho_day3_trot37.c3d	1	1.36844		Quemacho_day3_trot37.c3d	1	1.3637		Quemacho_day3_trot37.c3d	1	1.28914		Quemacho_day3_trot37.c3d	1	1.29139		0.079297			0.072318			Quemacho_day3_trot37.c3d	1	1.32321		Quemacho_day3_trot37.c3d	1	1.32605
-	2	1.36674		Quemacho_day3_trot40.c3d	1	1.35836		-	2	1.29354		Quemacho_day3_trot40.c3d	1	1.29698		0.073192			0.061373			-	2	1.32588		Quemacho_day3_trot40.c3d	1	1.32568
Quemacho_day3_trot40.c3d	1	1.36487		Quemacho_day3_trot42.c3d	1	1.36498		Quemacho_day3_trot40.c3d	1	1.30116		Quemacho_day3_trot42.c3d	1	1.29368		0.063713			0.071309			Quemacho_day3_trot40.c3d	1	1.32963		Quemacho_day3_trot42.c3d	1	1.32823
-	2	1.3671		-	2	1.37285		-	2	1.29395		-	2	1.2955		0.073154			0.077354			-	2	1.32618		-	2	1.33019
Quemacho_day3_trot42.c3d	1	1.36263		Quemacho_day3_trot43.c3d	1	1.36309		Quemacho_day3_trot42.c3d	1	1.29627		Quemacho_day3_trot43.c3d	1	1.29934		0.066362			0.063742			Quemacho_day3_trot42.c3d	1	1.32673		Quemacho_day3_trot43.c3d	1	1.32969
Quemacho_day3_trot43.c3d	1	1.36525		-	2	1.3675		Quemacho_day3_trot43.c3d	1	1.303		-	2	1.29815		0.062251			0.069356			Quemacho_day3_trot43.c3d	1	1.33156		-	2	1.32863
-	2	1.36391		Queba_day3_trot12.c3d	1	1.33885		-	2	1.30147		Queba_day3_trot12.c3d	1	1.2569		0.062434			0.081957			-	2	1.32906		Queba_day3_trot12.c3d	1	1.2968
Queba_day3_trot12.c3d	1	1.36732		Queba_day3_trot13.c3d	1	1.33974		Queba_day3_trot12.c3d	1	1.26399		Queba_day3_trot13.c3d	1	1.24845		0.103331			0.091294			Queba_day3_trot12.c3d	1	1.31196		Queba_day3_trot13.c3d	1	1.29175
-	2	1.33602		Queba_day3_trot14.c3d	1	1.35258		-	2	1.24935		Queba_day3_trot14.c3d	1	1.2654		0.086673			0.087177			-	2	1.29136		Queba_day3_trot14.c3d	1	1.3039
Queba_day3_trot13.c3d	1	1.35147		Queba_day3_trot15.c3d	1	1.31374		Queba_day3_trot13.c3d	1	1.25722		Queba_day3_trot15.c3d	1	1.23583		0.094251			0.077911			Queba_day3_trot13.c3d	1	1.29917		Queba_day3_trot15.c3d	1	1.27366
Queba_day3_trot14.c3d	1	1.37515		Queba_day3_trot16.c3d	1	1.32428		Queba_day3_trot14.c3d	1	1.25377		Queba_day3_trot16.c3d	1	1.24238		0.121383			0.081909			Queba_day3_trot14.c3d	1	1.29709		Queba_day3_trot16.c3d	1	1.28061
-	2	1.35162		Queba_day3_trot21.c3d	1	1.33272		-	2	1.2592		Queba_day3_trot21.c3d	1	1.21989		0.09242			0.11283			-	2	1.3017		Queba_day3_trot21.c3d	1	1.27108
Queba_day3_trot15.c3d	1	1.30491		Queba_day3_trot23.c3d	1	1.32888		Queba_day3_trot15.c3d	1	1.23376		Queba_day3_trot23.c3d	1	1.24575		0.071144			0.083124			Queba_day3_trot15.c3d	1	1.27004		Queba_day3_trot23.c3d	1	1.286
Queba_day3_trot16.c3d	1	1.321		Queba_day3_trot24.c3d	1	1.32846		Queba_day3_trot16.c3d	1	1.23641		Queba_day3_trot24.c3d	1	1.23786		0.084585			0.090594			Queba_day3_trot16.c3d	1	1.27127		Queba_day3_trot24.c3d	1	1.27845
Queba_day3_trot21.c3d	1	1.35451		Queba_day3_trot26.c3d	1	1.32794		Queba_day3_trot21.c3d	1	1.22118		Queba_day3_trot26.c3d	1	1.25894		0.133331			0.069008			Queba_day3_trot21.c3d	1	1.26595		Queba_day3_trot26.c3d	1	1.29463
Queba_day3_trot23.c3d	1	1.32333		Queba_day3_trot27.c3d	1	1.32255		Queba_day3_trot23.c3d	1	1.25191		Queba_day3_trot27.c3d	1	1.23886		0.071421			0.083696			Queba_day3_trot23.c3d	1	1.28625		Queba_day3_trot27.c3d	1	1.27872
Queba_day3_trot24.c3d	1	1.3361		Queba_day3_trot28.c3d	1	1.32945		Queba_day3_trot24.c3d	1	1.24429		Queba_day3_trot28.c3d	1	1.25031		0.091807			0.079144			Queba_day3_trot24.c3d	1	1.27821		Queba_day3_trot28.c3d	1	1.28627
Queba_day3_trot26.c3d	1	1.32241		-	2	1.33908		Queba_day3_trot26.c3d	1	1.25195		-	2	1.25395		0.070451			0.085129			Queba_day3_trot26.c3d	1	1.28306		-	2	1.28985
Queba_day3_trot27.c3d	1	1.33051		Queba_day3_trot29.c3d	1	1.33711		Queba_day3_trot27.c3d	1	1.23595		Queba_day3_trot29.c3d	1	1.213		0.094561			0.124107			Queba_day3_trot27.c3d	1	1.27242		Queba_day3_trot29.c3d	1	1.27253
-	2	1.31222		Queba_day3_trot6.c3d	1	1.34968		-	2	1.23439		Queba_day3_trot6.c3d	1	1.25904		0.077829			0.090645			-	2	1.27641		Queba_day3_trot6.c3d	1	1.30082
Queba_day3_trot28.c3d	1	1.32297		Queba_day3_trot7.c3d	1	1.34988		Queba_day3_trot28.c3d	1	1.25456		Queba_day3_trot7.c3d	1	1.25562		0.06841			0.094268			Queba_day3_trot28.c3d	1	1.28658		Queba_day3_trot7.c3d	1	1.30433
Queba_day3_trot29.c3d	1	1.29546		-	2	1.35799		Queba_day3_trot29.c3d	1	1.20722		-	2	1.25836		0.088237			0.099636			Queba_day3_trot29.c3d	1	1.24907		-	2	1.30299
Queba_day3_trot30.c3d	1	1.28757		Queba_Day4_passage10.c3d	1	1.37037		Queba_day3_trot30.c3d	1	1.20526		Queba_Day4_passage10.c3d	1	1.29137		0.082306			0.079001			Queba_day3_trot30.c3d	1	1.24796		Queba_Day4_passage10.c3d	1	1.3272
Queba_day3_trot6.c3d	1	1.3519		-	2	1.36686		Queba_day3_trot6.c3d	1	1.25396		-	2	1.29496		0.097938			0.071896			Queba_day3_trot6.c3d	1	1.29778		-	2	1.33089
-	2	1.34468		-	3	1.363		-	2	1.24949		-	3	1.27678		0.095182			0.086213			-	2	1.29474		-	3	1.3202
Queba_day3_trot7.c3d	1	1.34394		Queba_Day4_piaffe11.c3d	1	1.36298		Queba_day3_trot7.c3d	1	1.26141		Queba_Day4_piaffe11.c3d	1	1.25779		0.082527			0.105183			Queba_day3_trot7.c3d	1	1.30065		Queba_Day4_piaffe11.c3d	1	1.31054
Queba_Day4_passage10.c3d	1	1.36578		-	2	1.36654		Queba_Day4_passage10.c3d	1	1.2736		-	2	1.27165		0.092175			0.094888			Queba_Day4_passage10.c3d	1	1.31154		-	2	1.31501
-	2	1.36336		-	3	1.35518		-	2	1.27944		-	3	1.25008		0.083919			0.105091			-	2	1.31335		-	3	1.30383
-	3	1.3609		-	4	1.36196		-	3	1.27229		-	4	1.29176		0.088611			0.070202			-	3	1.31338		-	4	1.32508
Queba_Day4_piaffe11.c3d	1	1.36538		-	5	1.36884		Queba_Day4_piaffe11.c3d	1	1.27094		-	5	1.28209		0.094445			0.086749			Queba_Day4_piaffe11.c3d	1	1.30849		-	5	1.32142
-	2	1.35891		-	6	1.35699		-	2	1.26872		-	6	1.28406		0.090192			0.072932			-	2	1.31089		-	6	1.31718
-	3	1.34375		-	7	1.3536		-	3	1.27355		-	7	1.2846		0.070202			0.068996			-	3	1.30116		-	7	1.31994
-	4	1.36969		-	8	1.34794		-	4	1.27288		-	8	1.26504		0.096807			0.082899			-	4	1.31302		-	8	1.30632
-	5	1.36933		Queba_Day4_piaffe3.c3d	1	1.36826		-	5	1.24979		Queba_Day4_piaffe3.c3d	1	1.316		0.119544			0.052259			-	5	1.30505		Queba_Day4_piaffe3.c3d	1	1.34096
-	6	1.35247		-	2	1.36086		-	6	1.26244		-	2	1.31761		0.090023			0.043254			-	6	1.30258		-	2	1.33783
-	7	1.34844		-	3	1.36253		-	7	1.26021		-	3	1.28164		0.08823			0.080885			-	7	1.29642		-	3	1.31496
-	8	1.34686		-	4	1.36719		-	8	1.28423		-	4	1.28413		0.062634			0.08306			-	8	1.31134		-	4	1.32709
Queba_Day4_piaffe3.c3d	1	1.36969		-	5	1.36569		Queba_Day4_piaffe3.c3d	1	1.31402		-	5	1.2862		0.055669			0.079489			Queba_Day4_piaffe3.c3d	1	1.34366		-	5	1.32199
-	2	1.37063		-	6	1.34006		-	2	1.28924		-	6	1.28266		0.08139			0.057395			-	2	1.32745		-	6	1.30834
-	3	1.36399		Queba_Day4_piaffe7.c3d	1	1.3539		-	3	1.26966		Queba_Day4_piaffe7.c3d	1	1.29158		0.094326			0.062321			-	3	1.30772		Queba_Day4_piaffe7.c3d	1	1.3206
-	4	1.3589		-	2	1.35147		-	4	1.26256		-	2	1.274		0.096337			0.077468			-	4	1.30263		-	2	1.31033
-	5	1.36219		-	3	1.35009		-	5	1.27295		-	3	1.29229		0.08924			0.057797			-	5	1.30882		-	3	1.31876
Queba_Day4_piaffe7.c3d	1	1.34969		tando_passage4.c3d	1	1.31569		Queba_Day4_piaffe7.c3d	1	1.27779		tando_passage4.c3d	1	1.21645		0.071908			0.099239			Queba_Day4_piaffe7.c3d	1	1.31378		tando_passage4.c3d	1	1.26103
-	2	1.35086		tando_piaffe10.c3d	1	1.29928		-	2	1.28187		tando_piaffe10.c3d	1	1.24683		0.068997			0.052454			-	2	1.31354		tando_piaffe10.c3d	1	1.27337
tando_piaffe10.c3d	1	1.298		-	2	1.29502		tando_piaffe10.c3d	1	1.24737		-	2	1.24073		0.050627			0.054289			tando_piaffe10.c3d	1	1.26953		-	2	1.26789
-	2	1.29736			3	1.2551		-	2	1.23907		-	3	1.21577		0.058285			0.039327			-	2	1.26318		-	3	1.27227
-	3	1.30108		-	4	1.30505		-	3	1.21577		-	4	1.28328		0.085311			0.021773			-	3	1.25192		-	4	1.29259
-	4	1.30458		tando_piaffe15.c3d	1	1.32133		-	4	1.25253		tando_piaffe15.c3d	1	1.21154		0.052056			0.10979			-	4	1.27415		tando_piaffe15.c3d	1	1.26161
tando_piaffe13_2.c3d	1	1.31117		-	2	1.30093		tando_piaffe13_2.c3d	1	1.22805		-	2	1.19408		0.083128			0.106846			tando_piaffe13_2.c3d	1	1.26611		-	2	1.24542
tando_piaffe15.c3d	1	1.32225		tando_piaffe17.c3d	1	1.33807		tando_piaffe15.c3d	1	1.22054		tando_piaffe17.c3d	1	1.27833		0.101713			0.059744			tando_piaffe15.c3d	1	1.2646		tando_piaffe17.c3d	1	1.2925
-	2	1.30616		-	2	1.30268		-	2	1.20548		-	2	1.24145		0.100676			0.061225			-	2	1.25049		-	2	1.26661
tando_piaffe17.c3d	1	1.30268		tando_piaffe3.c3d	1	1.30771		tando_piaffe17.c3d	1	1.25187		tando_piaffe3.c3d	1	1.25007		0.050804			0.05764			tando_piaffe17.c3d	1	1.27229		tando_piaffe3.c3d	1	1.2798
	2	1.27929		-	2	1.3064			2	1.23755		-	2	1.27284		0.041734			0.033561			-	2	1.25167		-	2	1.2891
tando_piaffe3.c3d	1	1.30696		-	3	1.31855		tando_piaffe3.c3d	1	1.24412		-	3	1.2595		0.062836			0.059053			tando_piaffe3.c3d	1	1.27259		-	3	1.28701
-	2	1.3105		-	4	1.2851		-	2	1.25943		-	4	1.23954		0.051075			0.045552			-	2	1.28432		-	4	1.2625
-	3	1.3079		Tando_trot2s.c3d	1	1.2577		-	3	1.25443		Tando_trot2s.c3d	1	1.20296		0.053472			0.054747			-	3	1.27923		Tando_trot2s.c3d	1	1.2279
-	4	1.29658		Tando_trot3s.c3d	1	1.26329		-	4	1.23585		Tando_trot3s.c3d	1	1.21077		0.060727			0.052521			-	4	1.26177		Tando_trot3s.c3d	1	1.23437
Tando_trot2s.c3d	1	1.2478		Tando_trot4.c3d	1	1.26114		Tando_trot2s.c3d	1	1.19817		Tando_trot4.c3d	1	1.20166		0.049622			0.059486			Tando_trot2s.c3d	1	1.22296		Tando_trot4.c3d	1	1.22961
Tando_trot3s.c3d	1	1.26493		Tando_trot6s.c3d	1	1.26097		Tando_trot3s.c3d	1	1.20366		Tando_trot6s.c3d	1	1.20413		0.061267			0.056842			Tando_trot3s.c3d	1	1.23184		Tando_trot6s.c3d	1	1.23081
Tando_trot4.c3d	1	1.25974		-	2	1.26589		Tando_trot4.c3d	1	1.2048		-	2	1.21079		0.054941			0.055096			Tando_trot4.c3d	1	1.23064		-	2	1.23779
Tando_trot6s.c3d	1	1.26689		Tando_trot7s.c3d	1	1.25838		Tando_trot6s.c3d	1	1.2079		Tando_trot7s.c3d	1	1.20592		0.058984			0.052463			Tando_trot6s.c3d	1	1.23491		Tando_trot7s.c3d	1	1.23052
Tando_trot7s.c3d	1	1.25667		Tando_trot8s.c3d	1	1.28145		Tando_trot7s.c3d	1	1.20046		Tando_trot8s.c3d	1	1.21697		0.056204			0.064484			Tando_trot7s.c3d	1	1.22759		Tando_trot8s.c3d	1	1.24597

## Sheet: GRF VEC
Vector angles are in stance ON to LIFT
LF					RH					RF					LH
File	Item	VecMag	VecAng		File	Item	VecMag	VecAng		File	Item	VecMag	VecAng		File	Item	VecMag	VecAng
Passage1.c3d	1	42.335	-3.90546		Passage1.c3d	1	33.8484	5.2025		Passage1.c3d	1	44.0175	-2.53967		Passage1.c3d	1	34.4008	3.56364
Passage3.c3d	1	48.2442	-5.83956		Passage3.c3d	1	34.8993	0.89074		Passage3.c3d	1	46.4569	-2.69798		Passage3.c3d	1	35.9196	4.16066
-	2	44.7036	-5.14329		-	2	35.8192	4.16357		-	2	45.4991	-4.68242		-	2	36.2903	3.83762
Passage4.c3d	1	49.6562	-5.81495		Passage4.c3d	1	40.5505	3.9136		Passage4.c3d	1	52.7404	-2.00813		Passage4.c3d	1	42.3971	6.64631
-	2	53.4758	-4.46084		-	2	39.5061	4.77463		-	2	44.2738	-2.65042		-	2	34.6944	3.71147
Trot6.c3d	1	49.9149	-3.08197		Trot6.c3d	1	34.4094	2.26132		Trot6.c3d	1	47.8892	-0.931755		Trot6.c3d	1	35.3878	0.510867
-	2	49.0787	-2.39124		-	2	32.4804	1.52952		Trot7.c3d	1	45.7291	-0.927921		Trot7.c3d	1	34.5946	0.677314
Trot7.c3d	1	47.8966	-2.91383		Trot7.c3d	1	35.2442	1.98439		Queba_day2_piaffe3.c3d	1	45.7208	-2.72412		Queba_day2_piaffe3.c3d	1	38.9845	7.29516
-	2	48.4664	-3.53055		-	2	32.0952	0.06139		-	2	47.9008	-4.66182		-	2	38.7956	7.42093
Queba_day2_piaffe3.c3d	1	48.6806	-4.49415		Queba_day2_piaffe3.c3d	1	57.7385	-5.37735		Queba_day2_piaffe44.c3d	1	56.137	-1.83033		Queba_day2_piaffe44.c3d	1	37.8374	5.22727
Queba_day2_piaffe44.c3d	1	52.2482	-1.54133		Queba_day2_piaffe44.c3d	1	39.6539	5.57092		Queba_day2_piaffe45.c3d	1	62.5565	-1.22115		Queba_day2_piaffe45.c3d	1	43.7514	10.6335
Queba_day2_piaffe45.c3d	1	59.1463	1.02567		Queba_day2_piaffe45.c3d	1	51.3957	11.786		Queba_day2_piaffe46.c3d	1	53.4966	-1.00433		Queba_day2_piaffe46.c3d	1	39.5612	5.69921
Queba_day2_piaffe47.c3d	1	68.9583	-2.88167		Queba_day2_piaffe47.c3d	1	54.5734	5.3772		Queba_day2_piaffe47.c3d	1	67.1697	-2.15692		Queba_day2_piaffe47.c3d	1	48.2549	7.41163
Queba_day2_piaffe49.c3d	1	53.6809	-3.13119		Queba_day2_piaffe49.c3d	1	39.0154	3.99053		Queba_day2_piaffe49.c3d	1	53.3232	-0.720556		Queba_day2_piaffe49.c3d	1	35.5024	4.09569
Queba_day2_piaffe50.c3d	1	52.2914	-1.71865		Queba_day2_piaffe50.c3d	1	40.3393	4.65962		-	2	55.7525	-2.64472		-	2	34.8929	2.37745
-	2	50.1341	3.14563		-	2	40.896	4.4471		Queba_day2_piaffe50.c3d	1	57.1388	-1.54746		Queba_day2_piaffe50.c3d	1	37.7695	3.24965
Queba_day2_piaffe51.c3d	1	68.9674	-2.10849		Queba_day2_piaffe51.c3d	1	50.4535	6.15764		Queba_day2_piaffe51.c3d	1	67.5865	-1.85543		Queba_day2_piaffe51.c3d	1	48.4821	5.3957
Queba_day2_piaffe55.c3d	1	71.6919	-2.81924		Queba_day2_piaffe55.c3d	1	45.7798	3.73053		Queba_day2_piaffe53.c3d	1	68.2751	-1.10123		Queba_day2_piaffe53.c3d	1	49.135	6.76147
Queba_day2_piaffe56.c3d	1	67.7527	-2.59079		Queba_day2_piaffe56.c3d	1	51.216	5.19382		Queba_day2_piaffe55.c3d	1	70.0691	0.0289956		Queba_day2_piaffe55.c3d	1	49.818	7.60036
Queba_day2_piaffe6.c3d	1	53.1451	-5.69755		Queba_day2_piaffe6.c3d	1	39.807	2.17409		Queba_day2_piaffe56.c3d	1	67.1742	-0.359704		Queba_day2_piaffe56.c3d	1	35.5309	4.46249
Queba_day2_piaffe7.c3d	1	46.6893	-2.44895		Queba_day2_piaffe7.c3d	1	38.2795	2.1428		Queba_day2_piaffe6.c3d	1	53.7746	-2.93785		Queba_day2_piaffe6.c3d	1	42.2941	4.47495
-	2	47.7348	-3.97204		-	2	34.334	1.69702		Queba_day2_piaffe7.c3d	1	51.494	-3.6894		Queba_day2_piaffe7.c3d	1	39.3921	5.96284
Quemacho_day2_walk10.c3d	1	38.7231	0.0145771		Quemacho_day2_walk10.c3d	1	38.2961	1.08594		-	2	51.3014	-4.30495		-	2	38.4538	6.1592
Quemacho_day2_walk12.c3d	1	47.0065	-1.26534		Quemacho_day2_walk12.c3d	1	38.2564	3.16446		Quemacho_day2_walk10.c3d	1	40.6318	1.95681		Quemacho_day2_walk10.c3d	1	37.7642	0.159384
Quemacho_day2_walk42.c3d	1	38.3075	-2.08882		Quemacho_day2_walk42.c3d	1	35.7542	4.48933		-	2	41.5091	-1.21316		-	2	40.4902	-0.861244
-	2	39.867	-2.21373		-	2	32.8865	1.63623		Quemacho_day2_walk12.c3d	1	45.5759	0.566645		Quemacho_day2_walk12.c3d	1	38.4311	2.8112
Quemacho_day2_walk49.c3d	1	66.4053	-4.29031		Quemacho_day2_walk49.c3d	1	44.5337	4.74161		Quemacho_day2_walk42.c3d	1	36.7909	-2.42363		Quemacho_day2_walk42.c3d	1	36.332	-0.835276
Quemacho_day2_walk50.c3d	1	66.388	-2.53887		Quemacho_day2_walk50.c3d	1	47.2795	4.02142		-	2	42.2648	0.268061		-	2	34.9956	-0.761916
Quemacho_day3_trot29.c3d	1	50.2313	-1.89684		Quemacho_day3_trot29.c3d	1	37.5163	2.47333		Quemacho_day2_walk49.c3d	1	61.9152	-0.285831		Quemacho_day2_walk49.c3d	1	47.418	3.51171
-	2	50.5568	-2.4595		-	2	38.0883	2.08849		Quemacho_day2_walk50.c3d	1	69.6117	-0.436103		Quemacho_day2_walk50.c3d	1	44.7243	4.07246
Quemacho_day3_trot31.c3d	1	48.7994	-1.74429		Quemacho_day3_trot31.c3d	1	36.8665	2.45878		Quemacho_day3_trot29.c3d	1	48.2764	0.102515		Quemacho_day3_trot29.c3d	1	38.9174	2.00559
-	2	48.6138	-2.15474		-	2	37.2337	1.83914		Quemacho_day3_trot31.c3d	1	45.3397	0.644115		Quemacho_day3_trot31.c3d	1	39.0619	2.54866
Quemacho_day3_trot37.c3d	1	51.3764	-2.4111		Quemacho_day3_trot37.c3d	1	37.9336	3.87855		Quemacho_day3_trot37.c3d	1	48.4449	-1.05594		Quemacho_day3_trot37.c3d	1	38.4502	0.769741
-	2	48.9696	-2.12872		-	2	37.1581	3.50583		Quemacho_day3_trot40.c3d	1	46.8904	-0.745929		Quemacho_day3_trot40.c3d	1	35.509	0.984498
Quemacho_day3_trot40.c3d	1	49.6307	-2.32906		Quemacho_day3_trot40.c3d	1	32.7614	2.78815		Quemacho_day3_trot42.c3d	1	47.6301	-1.23172		Quemacho_day3_trot42.c3d	1	39.6261	1.90268
-	2	50.2308	-2.60072		-	2	32.9912	2.22415		-	2	48.9795	-1.0442		-	2	37.6887	0.745502
Quemacho_day3_trot42.c3d	1	50.927	-2.03321		Quemacho_day3_trot42.c3d	1	36.1143	2.65144		Quemacho_day3_trot43.c3d	1	46.4698	-0.884544		Quemacho_day3_trot43.c3d	1	37.3187	2.03907
Quemacho_day3_trot43.c3d	1	49.9846	-2.62661		Quemacho_day3_trot43.c3d	1	34.8467	1.55891		-	2	48.2244	-1.42624		-	2	36.4943	0.622513
-	2	50.541	-3.18012		-	2	35.0342	2.59864		Queba_day3_trot12.c3d	1	56.5612	-2.60718		Queba_day3_trot12.c3d	1	38.466	3.93759
Queba_day3_trot12.c3d	1	50.8705	-2.41555		Queba_day3_trot12.c3d	1	43.412	3.08997		Queba_day3_trot13.c3d	1	51.1664	-2.27807		Queba_day3_trot13.c3d	1	40.0347	4.64174
-	2	53.7548	-1.84627		-	2	39.858	2.47469		Queba_day3_trot14.c3d	1	53.489	-3.37997		Queba_day3_trot14.c3d	1	37.0497	2.35307
Queba_day3_trot13.c3d	1	51.1651	-1.69942		Queba_day3_trot13.c3d	1	40.8923	3.84972		Queba_day3_trot15.c3d	1	60.6691	-2.01586		Queba_day3_trot15.c3d	1	43.3405	4.02287
Queba_day3_trot14.c3d	1	51.2361	-1.68817		Queba_day3_trot14.c3d	1	42.1591	6.19896		Queba_day3_trot16.c3d	1	60.0099	-1.99455		Queba_day3_trot16.c3d	1	43.7097	3.42453
-	2	62.7966	-2.31908		-	2	36.3978	2.69688		Queba_day3_trot21.c3d	1	66.7031	-1.68294		Queba_day3_trot21.c3d	1	47.8308	7.91171
Queba_day3_trot15.c3d	1	63.9063	-1.28004		Queba_day3_trot15.c3d	1	45.7195	3.72534		Queba_day3_trot23.c3d	1	54.1525	-2.18005		Queba_day3_trot23.c3d	1	42.7151	3.6918
Queba_day3_trot16.c3d	1	59.7501	-1.46354		Queba_day3_trot16.c3d	1	46.1114	5.31046		Queba_day3_trot24.c3d	1	53.5724	-1.63808		Queba_day3_trot24.c3d	1	42.2139	3.80375
Queba_day3_trot21.c3d	1	62.7564	0.0604591		Queba_day3_trot21.c3d	1	50.7176	8.78226		Queba_day3_trot26.c3d	1	56.5207	-1.6374		Queba_day3_trot26.c3d	1	38.1174	2.46727
Queba_day3_trot23.c3d	1	57.524	-1.62341		Queba_day3_trot23.c3d	1	41.1092	5.93103		Queba_day3_trot27.c3d	1	58.7882	-1.62774		Queba_day3_trot27.c3d	1	42.4506	4.22764
Queba_day3_trot24.c3d	1	54.9633	-0.207027		Queba_day3_trot24.c3d	1	42.6156	6.80455		Queba_day3_trot28.c3d	1	51.3887	-1.07821		Queba_day3_trot28.c3d	1	41.265	3.36204
Queba_day3_trot26.c3d	1	55.2419	-0.648689		Queba_day3_trot26.c3d	1	42.4496	4.23538		-	2	54.2979	-1.49411		-	2	40.2149	1.4719
Queba_day3_trot27.c3d	1	56.6133	-0.471184		Queba_day3_trot27.c3d	1	44.4345	7.54094		Queba_day3_trot29.c3d	1	69.6254	-0.787426		Queba_day3_trot29.c3d	1	47.3449	6.72313
-	2	63.8312	-0.453725		-	2	44.7199	5.09509		Queba_day3_trot6.c3d	1	53.8097	-3.21954		Queba_day3_trot6.c3d	1	38.7862	3.65908
Queba_day3_trot28.c3d	1	53.0494	-2.0135		Queba_day3_trot28.c3d	1	38.2265	4.09637		Queba_day3_trot7.c3d	1	53.846	-3.80574		Queba_day3_trot7.c3d	1	38.5745	3.64624
Queba_day3_trot29.c3d	1	70.9748	-0.590175		Queba_day3_trot29.c3d	1	53.2831	7.51584		-	2	57.1032	-2.81629		-	2	37.7189	1.86384
Queba_day3_trot30.c3d	1	66.2632	-1.52319		Queba_day3_trot30.c3d	1	54.7463	7.87011		Queba_Day4_passage10.c3d	1	42.8068	1.78735		Queba_Day4_passage10.c3d	1	33.2208	-1.60035
Queba_day3_trot6.c3d	1	51.5871	-2.70636		Queba_day3_trot6.c3d	1	42.8776	5.4888		-	2	40.9576	2.96131		-	2	32.15	1.17562
-	2	53.9616	-1.9652		-	2	40.4152	3.87681		-	3	38.6318	0.811635		-	3	34.7529	0.99593
Queba_day3_trot7.c3d	1	55.863	-2.21571		Queba_day3_trot7.c3d	1	39.0755	4.19459		Queba_Day4_piaffe11.c3d	1	43.6321	0.266079		Queba_Day4_piaffe11.c3d	1	40.4313	2.70925
Queba_Day4_passage10.c3d	1	41.8522	-1.07232		Queba_Day4_passage10.c3d	1	34.1247	-1.0628		-	2	41.4174	-1.61763		-	2	39.19	1.64037
-	2	43.0916	-0.517049		-	2	34.131	-0.847451							-	3
-	3	39.8177	0.607321		-	3	35.2493	2.46756		-	4	41.4044	0.657782		-	4	38.1891	-2.03057
Queba_Day4_piaffe11.c3d	1	47.4297	0.80596		Queba_Day4_piaffe11.c3d	1	35.0833	-3.41026		-	5	44.7088	0.997582		-	5	34.9972	1.24902
-	2	43.4296	-1.33846		-	2	35.2206	1.54382		-	6	43.6637	-0.269841		-	6	36.7804	0.947582
-	3	46.7352	-1.08284		-	3	33.7718	-3.83202		-	7	40.1247	2.61944		-	7	36.2589	0.112434
-	4	44.1021	-0.21102		-	4	37.3818	-1.47875		-	8	38.8775	1.79492		-	8	38.7768	0.8288
-	5	45.6907	-1.35063		-	5	34.2642	-0.953346		Queba_Day4_piaffe3.c3d	1	40.6593	1.46032		Queba_Day4_piaffe3.c3d	1	33.5032	0.800564
-	6	45.103	-0.324202		-	6	34.3848	-2.72295		-	2	40.8726	0.40156		-	2	34.4085	1.58202
-	7	45.0279	-0.700519		-	7	34.154	-3.02175		-	3	41.8887	1.16827		-	3	33.1376	0.246798
-	8	42.0927	2.28891		-	8	27.3902	0.217226		-	4	41.9462	2.83665		-	4	36.2675	2.18439
Queba_Day4_piaffe3.c3d	1	43.0827	0.934265		Queba_Day4_piaffe3.c3d	1	33.288	0.0693094		-	5	43.6693	2.48356		-	5	35.1594	0.551158
-	2	44.2742	0.655796		-	2	32.7991	-3.43507		-	6	38.2291	2.91999		-	6	37.5357	4.8393
-	3	43.3432	-0.158469		-	3	32.3379	-3.05613		Queba_Day4_piaffe7.c3d	1	39.6692	2.42593		Queba_Day4_piaffe7.c3d	1	32.7077	-0.529407
-	4	40.6235	-0.442206		-	4	35.8156	-1.9126		-	2	42.4806	0.533256		-	2	32.6779	-1.4788
-	5	40.6345	-1.1946		-	5	35.6775	2.07935		-	3	43.0858	0.553267		-	3	31.5104	-0.259606
Queba_Day4_piaffe7.c3d	1	41.281	1.81624		Queba_Day4_piaffe7.c3d	1	32.346	-0.606768		tando_passage4.c3d	1	47.508	-6.27088		tando_passage4.c3d	1	35.4164	-0.438867
-	2	44.8859	1.32553		-	2	31.54	-3.73731		tando_piaffe10.c3d	1	39.973	2.26488		tando_piaffe10.c3d	1	35.8335	2.29742
tando_piaffe10.c3d	1	40.9029	-2.45426		tando_piaffe10.c3d	1	33.9018	-1.02158		-	2	39.2577	-1.58266		-	2	32.9998	4.14094
-	2	39.473	-2.08856		-	2	39.3023	1.20204		-	3	39.8177	-4.39122		-	3	35.7543	2.7083
										-	4	40.206	-0.305603		-	4	35.6208	2.67319
-	4	39.3551	-1.46478		-	4	31.2374	2.5075		tando_piaffe15.c3d	1	46.3589	-5.64495		tando_piaffe15.c3d	1	34.4758	3.77532
tando_piaffe13_2.c3d	1	45.5965	-5.72429		tando_piaffe13_2.c3d	1	36.7785	-0.830938		-	2	44.1738	-2.85287		-	2	37.492	5.39549
tando_piaffe15.c3d	1	45.0702	-4.36167		tando_piaffe15.c3d	1	35.9209	3.52702		tando_piaffe17.c3d	1				tando_piaffe17.c3d	1
-	2	42.0026	-2.20257		-	2	39.3109	6.90177			2
tando_piaffe17.c3d	1	42.953	-1.81401		tando_piaffe17.c3d	1	34.7996	-0.0800686		tando_piaffe3.c3d	1	38.7099	0.353699		tando_piaffe3.c3d	1	39.6831	4.45724
-	2	32.7885	0.45613		-	2	42.6306	0.000930922		-	2	40.721	-0.757047		-	2	32.9935	2.01566
tando_piaffe3.c3d	1	41.9784	-0.686246		tando_piaffe3.c3d	1	35.0397	1.32522		-	3	39.622	-0.285564		-	3	34.0887	3.06429
-	2	43.0895	-2.16987		-	2	32.7747	-1.51828		-	4	32.4999	1.84498		-	4	41.7286	3.85646
-	3	41.3322	-1.10855		-	3	35.598	-0.211356		Tando_trot2s.c3d	1	39.3572	1.65498		Tando_trot2s.c3d	1	37.1038	0.859186
-	4	42.5127	0.324083		-	4	34.7031	-2.4585		Tando_trot3s.c3d	1	36.3924	2.80415		Tando_trot3s.c3d	1	37.9461	1.82363
Tando_trot2s.c3d	1	52.7651	-0.232093		Tando_trot2s.c3d	1	40.5324	5.43992		Tando_trot4.c3d	1	53.4829	-1.38643		Tando_trot4.c3d	1	40.3695	1.64148
Tando_trot3s.c3d	1	53.6823	-1.81988		Tando_trot3s.c3d	1	38.1437	0.664553		Tando_trot6s.c3d	1	55.1077	-1.88581		Tando_trot6s.c3d	1	38.0444	1.19857
Tando_trot4.c3d	1	53.6925	-1.36343		Tando_trot4.c3d	1	38.8329	1.47576		-	2	52.5992	-1.76364		-	2	37.3085	2.29315
Tando_trot6s.c3d	1	52.7798	-1.85765		Tando_trot6s.c3d	1	37.2889	0.600046		Tando_trot7s.c3d	1	37.9173	3.41681		Tando_trot7s.c3d	1	37.2085	2.61144
Tando_trot7s.c3d	1	53.0995	-1.72436		Tando_trot7s.c3d	1	37.1767	1.00702		Tando_trot8s.c3d	1	51.0831	-1.94112		Tando_trot8s.c3d	1	36.2706	0.517436
					RH GRF SUM_6
					File	Item

## Sheet: LIMB ANGLES
Limb angles are during stance only ON to LIFT
LIMB ANGLE LF										LIMB ANGLE RH										LIMB ANGLE RF										LIMB ANGLE MEAN LH
File	Item				Max retraction	Max protraction	Range	Mean		File	Item				Max retraction	Max protraction	Range	Mean		File	Item				Max retraction	Max protraction	Range	Mean		File	Item				Max retraction	Max protraction	Range	Mean
Passage1.c3d	1	-0.08312	0.245436	0.067067	-4.76243	14.0624	18.8249	3.84266		Passage1.c3d	1	-0.200446	0.199412	-0.017281	-11.4847	11.4255	22.9102	-0.990128		Passage1.c3d	1	-0.089533	0.229076	0.069	-5.12986	13.1251	18.255	3.95341		Passage1.c3d	1	-0.1811	0.198404	-0.009438	-10.3763	11.3677	21.744	-0.540758
Passage3.c3d	1	-0.057772	0.246819	0.077765	-3.31009	14.1417	17.4518	4.45561		Passage3.c3d	1	-0.169696	0.242578	0.025518	-9.72286	13.8987	23.6216	1.46207		Passage3.c3d	1	-0.088118	0.225819	0.069121	-5.04879	12.9385	17.9873	3.96034		Passage3.c3d	1	-0.2193	0.184698	-0.027174	-12.565	10.5824	23.1474	-1.55696
-	2	-0.063813	0.246908	0.083967	-3.65622	14.1468	17.803	4.81095		-	2	-0.194508	0.17754	-0.019946	-11.1445	10.1723	21.3168	-1.14282		-	2	-0.042275	0.241877	0.097077	-2.42218	13.8585	16.2807	5.5621		-	2	-0.174195	0.194543	-0.006338	-9.98064	11.1465	21.1271	-0.363141
Passage4.c3d	1	-0.098799	0.275345	0.082163	-5.66077	15.7761	21.4369	4.70759		Passage4.c3d	1	-0.203481	0.238586	0.004743	-11.6586	13.67	25.3286	0.271754		Passage4.c3d	1	-0.115021	0.224875	0.059195	-6.59022	12.8844	19.4746	3.39162		Passage4.c3d	1	-0.261094	0.181628	-0.050669	-14.9596	10.4065	25.3661	-2.90312
-	2	-0.009145	0.263366	0.129511	-0.52397	15.0898	15.6137	7.42043		-	2	-0.195743	0.232947	0.002651	-11.2152	13.3469	24.5621	0.151891		-	2	-0.086498	0.293015	0.089953	-4.95597	16.7885	21.7445	5.15393		-	2	-0.238544	0.205157	-0.027138	-13.6676	11.7546	25.4222	-1.55489
Trot6.c3d	1	-0.224723	0.329054	0.041056	-12.8757	18.8534	31.7291	2.35234		Trot6.c3d	1	-0.332842	0.27987	-0.031743	-19.0704	16.0354	35.1058	-1.81874		Trot6.c3d	1	-0.25947	0.310973	0.029219	-14.8665	17.8174	32.684	1.67413		Trot6.c3d	1	-0.319156	0.32355	0.007532	-18.2863	18.538	36.8243	0.431552
-	2	-0.2361	0.32848	0.033928	-13.5275	18.8205	32.3481	1.94393		-	2	-0.30464	0.300366	-0.000559	-17.4546	17.2097	34.6643	-0.0320283		Trot7.c3d	1	-0.260769	0.323216	0.032956	-14.941	18.5189	33.4599	1.88824		Trot7.c3d	1	-0.326755	0.324281	-0.003291	-18.7217	18.5799	37.3016	-0.18856
Trot7.c3d	1	-0.251749	0.337312	0.029593	-14.4242	19.3266	33.7507	1.69555		Trot7.c3d	1	-0.328916	0.257911	-0.043048	-18.8455	14.7772	33.6227	-2.46647		Queba_day2_piaffe3.c3d	1	-0.172214	0.273248	0.064338	-9.86714	15.656	25.5231	3.6863		Queba_day2_piaffe3.c3d	1	-0.298527	0.165332	-0.073411	-17.1043	9.47283	26.5772	-4.20614
-	2	-0.232443	0.335093	0.036523	-13.318	19.1994	32.5174	2.09261		-	2	-0.293217	0.285325	-0.009112	-16.8001	16.3479	33.148	-0.522079		-	2	-0.251244	0.310367	0.074896	-14.3952	17.7827	32.1779	4.29122		-	2	-0.310086	0.120575	-0.106309	-17.7666	6.90844	24.6751	-6.09106
Queba_day2_piaffe3.c3d	1	-0.141069	0.285025	0.072024	-8.08266	16.3307	24.4134	4.12667		Queba_day2_piaffe3.c3d	1	-0.154993	0.216597	0.022318	-8.88044	12.4101	21.2905	1.27873		Queba_day2_piaffe44.c3d	1	-0.233124	0.325551	0.053764	-13.357	18.6527	32.0097	3.08045		Queba_day2_piaffe44.c3d	1	-0.345142	0.326847	-0.008716	-19.7752	18.727	38.5021	-0.49939
Queba_day2_piaffe44.c3d	1	-0.243416	0.33196	0.045262	-13.9467	19.0199	32.9666	2.59332		Queba_day2_piaffe44.c3d	1	-0.381078	0.299585	-0.040428	-21.8342	17.165	38.9991	-2.31635		Queba_day2_piaffe45.c3d	1	-0.290924	0.389022	0.052721	-16.6687	22.2893	38.958	3.02069		Queba_day2_piaffe45.c3d	1	-0.501695	0.329469	-0.089095	-28.745	18.8772	47.6222	-5.10477
Queba_day2_piaffe45.c3d	1	-0.305024	0.31723	0.009907	-17.4766	18.1759	35.6525	0.567629		Queba_day2_piaffe45.c3d	1	-0.440834	0.308332	-0.067942	-25.2579	17.6661	42.924	-3.89279		Queba_day2_piaffe46.c3d	1	-0.2438	0.340491	0.054586	-13.9687	19.5087	33.4774	3.12755		Queba_day2_piaffe46.c3d	1	-0.371307	0.337813	-0.011302	-21.2743	19.3553	40.6296	-0.647557
Queba_day2_piaffe47.c3d	1	-0.341139	0.417307	0.042143	-19.5458	23.9099	43.4558	2.41462		Queba_day2_piaffe47.c3d	1	-0.44394	0.341882	-0.063353	-25.4359	19.5884	45.0243	-3.62986		Queba_day2_piaffe47.c3d	1	-0.435697	0.41736	0.024454	-24.9636	23.913	48.8766	1.40111		Queba_day2_piaffe47.c3d	1	-0.48565	0.297381	-0.104585	-27.8257	17.0387	44.8644	-5.99228
Queba_day2_piaffe49.c3d	1	-0.22703	0.329477	0.053165	-13.0079	18.8776	31.8855	3.04613		Queba_day2_piaffe49.c3d	1	-0.366616	0.274169	-0.050949	-21.0055	15.7087	36.7143	-2.91916		Queba_day2_piaffe49.c3d	1	-0.233872	0.326531	0.047021	-13.3999	18.7088	32.1087	2.6941		Queba_day2_piaffe49.c3d	1	-0.34089	0.317358	-0.018141	-19.5316	18.1833	37.7148	-1.0394
Queba_day2_piaffe50.c3d	1	-0.257407	0.344097	0.052554	-14.7483	19.7153	34.4636	3.01112		Queba_day2_piaffe50.c3d	1	-0.413185	0.324272	-0.046934	-23.6738	18.5794	42.2532	-2.68912		-	2	-0.198583	0.349399	0.073873	-11.378	20.0191	31.3971	4.23261		-	2	-0.321574	0.32239	-0.005861	-18.4248	18.4716	36.8964	-0.335811
-	2	-0.272228	0.343863	0.040549	-15.5975	19.7019	35.2994	2.32329		-	2	-0.387971	0.307876	-0.042323	-22.2291	17.64	39.8691	-2.42493		Queba_day2_piaffe50.c3d	1	-0.221683	0.351504	0.064547	-12.7015	20.1397	32.8412	3.69827		Queba_day2_piaffe50.c3d	1	-0.356032	0.335649	-0.015088	-20.3991	19.2313	39.6304	-0.864479
Queba_day2_piaffe51.c3d	1	-0.322064	0.383916	0.036537	-18.4529	21.9968	40.4497	2.09342		Queba_day2_piaffe51.c3d	1	-0.461595	0.344802	-0.062793	-26.4474	19.7557	46.2031	-3.59777		Queba_day2_piaffe51.c3d	1	-0.333534	0.39312	0.033729	-19.1101	22.5241	41.6342	1.93253		Queba_day2_piaffe51.c3d	1	-0.429361	0.351294	-0.040884	-24.6006	20.1277	44.7282	-2.34248
Queba_day2_piaffe55.c3d	1	-0.32868	0.414801	0.043854	-18.832	23.7663	42.5983	2.51265		Queba_day2_piaffe55.c3d	1	-0.47953	0.347773	-0.071336	-27.475	19.9259	47.401	-4.08725		Queba_day2_piaffe53.c3d	1	-0.353309	0.402584	0.029531	-20.2431	23.0664	43.3095	1.692		Queba_day2_piaffe53.c3d	1	-0.470052	0.351224	-0.060573	-26.932	20.1237	47.0556	-3.47058
Queba_day2_piaffe56.c3d	1	-0.316005	0.401613	0.036461	-18.1058	23.0107	41.1165	2.08906		Queba_day2_piaffe56.c3d	1	-0.448299	0.363365	-0.032777	-25.6856	20.8193	46.5049	-1.87798		Queba_day2_piaffe55.c3d	1	-0.46789	0.378854	-0.039176	-26.8081	21.7067	48.5149	-2.24462		Queba_day2_piaffe55.c3d	1	-0.468774	0.380831	-0.042093	-26.8588	21.82	48.6788	-2.41175
Queba_day2_piaffe6.c3d	1	-0.115839	0.271775	0.07915	-6.63709	15.5716	22.2086	4.53496		Queba_day2_piaffe6.c3d	1	-0.214971	0.185234	-0.027804	-12.3169	10.6131	22.9301	-1.59305		Queba_day2_piaffe56.c3d	1	-0.440477	0.388185	0.031969	-25.2375	22.2414	47.4788	1.83169		Queba_day2_piaffe56.c3d	1	-0.459106	0.352686	-0.049031	-26.3048	20.2074	46.5123	-2.80927
Queba_day2_piaffe7.c3d	1	-0.177884	0.2588	0.042017	-10.192	14.8281	25.0202	2.4074		Queba_day2_piaffe7.c3d	1	-0.216758	0.229356	0.001583	-12.4193	13.1411	25.5604	0.0906992		Queba_day2_piaffe6.c3d	1	-0.140599	0.244448	0.061092	-8.05573	14.0058	22.0616	3.50031		Queba_day2_piaffe6.c3d	1	-0.228026	0.202866	-0.01854	-13.0649	11.6234	24.6883	-1.06226
-	2	-0.143179	0.275461	0.059989	-8.20355	15.7828	23.9863	3.43712		-	2	-0.211619	0.220456	-0.003793	-12.1249	12.6312	24.7561	-0.217323		Queba_day2_piaffe7.c3d	1	-0.110808	0.269276	0.088915	-6.34883	15.4284	21.7772	5.09445		Queba_day2_piaffe7.c3d	1	-0.263556	0.180209	-0.048624	-15.1006	10.3252	25.4259	-2.78595
Quemacho_day2_walk10.c3d	1	0.024366	0.088874	0.042482	1.39607	5.09211	3.69604	2.43404		Quemacho_day2_walk10.c3d	1	0.077597	0.130312	0.086032	4.44598	7.46633	3.02035	4.92927		-	2	-0.103407	0.25718	0.084917	-5.92478	14.7353	20.6601	4.86539		-	2	-0.282041	0.160216	-0.070176	-16.1598	9.1797	25.3395	-4.02079
Quemacho_day2_walk12.c3d	1	-0.307128	0.325641	-0.000485	-17.5971	18.6579	36.255	-0.0277885		Quemacho_day2_walk12.c3d	1	-0.30143	0.266031	-0.016341	-17.2707	15.2425	32.5131	-0.93627		Quemacho_day2_walk10.c3d	1	0.065423	0.11714	0.087067	3.74846	6.71163	2.96317	4.98857		Quemacho_day2_walk10.c3d	1	0.143718	0.189169	0.154058	8.23443	10.8386	2.60415	8.82687
Quemacho_day2_walk42.c3d	1	0.025979	0.137768	0.077244	1.48849	7.89352	6.40504	4.42576		Quemacho_day2_walk42.c3d	1	-0.0191	0.122381	0.027362	-1.09435	7.01191	8.10626	1.56773		-	2	0.053241	0.102214	0.072253	3.05048	5.85643	2.80595	4.13979		-	2	0.192543	0.238758	0.203886	11.0319	13.6798	2.64792	11.6818
-	2	0.039621	0.130798	0.05985	2.27012	7.49417	5.22406	3.42915		-	2	0.032488	0.135018	0.06257	1.86143	7.73596	5.87454	3.585		Quemacho_day2_walk12.c3d	1	-0.297793	0.313976	0.005597	-17.0623	17.9895	35.0518	0.320684		Quemacho_day2_walk12.c3d	1	-0.315426	0.28874	-0.007235	-18.0726	16.5436	34.6162	-0.414535
Quemacho_day3_trot29.c3d	1	-0.344664	0.275996	-0.024709	-19.7478	15.8134	35.5612	-1.41572		Quemacho_day2_walk49.c3d	1	-0.360428	0.275516	-0.048943	-20.651	15.7859	36.4369	-2.80423												Quemacho_day2_walk42.c3d	1	0.075784	0.169852	0.120391	4.3421	9.7318	5.3897	6.8979
-	2	-0.273987	0.351474	0.031623	-15.6983	20.138	35.8363	1.81186		Quemacho_day2_walk50.c3d	1	-0.364314	0.308113	-0.028924	-20.8737	17.6536	38.5272	-1.65722												-	2	0.055945	0.145096	0.101378	3.20541	8.31339	5.10798	5.80853
Quemacho_day3_trot31.c3d	1	-0.275102	0.318862	0.010841	-15.7622	18.2694	34.0316	0.621144		Quemacho_day3_trot29.c3d	1	-0.323391	0.283295	-0.018245	-18.5289	16.2316	34.7605	-1.04536												Quemacho_day2_walk49.c3d	1	-0.355146	0.312305	-0.018159	-20.3484	17.8938	38.2421	-1.04043
-	2	-0.273991	0.341158	0.020884	-15.6985	19.5469	35.2454	1.19657		-	2	-0.316413	0.294203	-0.009456	-18.1291	16.8566	34.9857	-0.541789												Quemacho_day2_walk50.c3d	1	-0.315061	0.358762	0.009961	-18.0517	20.5555	38.6072	0.570723
Quemacho_day3_trot37.c3d	1	-0.224807	0.322045	0.040807	-12.8805	18.4518	31.3323	2.33807		Quemacho_day3_trot31.c3d	1	-0.311144	0.284338	-0.012241	-17.8272	16.2914	34.1186	-0.701358		Quemacho_day3_trot29.c3d	1	-0.309531	0.320383	0.008912	-17.7348	18.3566	36.0914	0.51062		Quemacho_day3_trot29.c3d	1	-0.334223	0.313587	-0.005204	-19.1496	17.9672	37.1168	-0.298167
-	2	-0.237053	0.331897	0.036294	-13.5821	19.0163	32.5984	2.07949		-	2	-0.295752	0.305531	0.007956	-16.9453	17.5056	34.451	0.455845		Quemacho_day3_trot31.c3d	1	-0.32416	0.306084	-0.007461	-18.573	17.5373	36.1103	-0.427484		Quemacho_day3_trot31.c3d	1	-0.323676	0.297743	-0.009705	-18.5453	17.0594	35.6047	-0.556056
Quemacho_day3_trot40.c3d	1	-0.327199	0.235436	-0.034475	-18.7471	13.4895	32.2366	-1.97527		Quemacho_day3_trot37.c3d	1	-0.313443	0.251136	-0.034203	-17.959	14.389	32.348	-1.95969		Quemacho_day3_trot37.c3d	1	-0.25106	0.29728	0.02735	-14.3847	17.0329	31.4176	1.56704		Quemacho_day3_trot37.c3d	1	-0.280903	0.306977	0.021848	-16.0946	17.5885	33.683	1.2518
-	2	-0.335292	0.234867	-0.038738	-19.2108	13.4569	32.6677	-2.21952		-	2	-0.299879	0.252088	-0.026997	-17.1818	14.4436	31.6254	-1.54681		Quemacho_day3_trot40.c3d	1	-0.265674	0.297862	0.021986	-15.222	17.0662	32.2882	1.25971		Quemacho_day3_trot40.c3d	1	-0.323327	0.312802	-0.00445	-18.5253	17.9222	36.4475	-0.254966
Quemacho_day3_trot42.c3d	1	-0.232203	0.317009	0.029738	-13.3043	18.1633	31.4675	1.70386		Quemacho_day3_trot40.c3d	1	-0.323823	0.279128	-0.028036	-18.5537	15.9929	34.5465	-1.60634		Quemacho_day3_trot42.c3d	1	-0.247736	0.28719	0.029404	-14.1942	16.4548	30.649	1.68473		Quemacho_day3_trot42.c3d	1	-0.297791	0.278453	-0.004027	-17.0622	15.9542	33.0163	-0.23073
Quemacho_day3_trot43.c3d	1	-0.311526	0.226164	-0.033469	-17.8491	12.9582	30.8074	-1.91763		-	2	-0.318308	0.293674	-0.011366	-18.2377	16.8263	35.064	-0.651224		-	2	-0.246726	0.310044	0.032868	-14.1364	17.7642	31.9006	1.8832		-	2	-0.298648	0.28527	-0.001964	-17.1113	16.3448	33.456	-0.112529
-	2	-0.319835	0.211559	-0.042956	-18.3252	12.1214	30.4466	-2.4612		Quemacho_day3_trot42.c3d	1	-0.294245	0.265492	-0.017	-16.859	15.2116	32.0706	-0.974028		Quemacho_day3_trot43.c3d	1	-0.255148	0.299279	0.026297	-14.6189	17.1474	31.7663	1.50671		Quemacho_day3_trot43.c3d	1	-0.292743	0.270023	-0.004976	-16.7729	15.4712	32.2441	-0.285104
Queba_day3_trot12.c3d	1	-0.2321	0.337391	0.058267	-13.2984	19.3311	32.6294	3.33845		Quemacho_day3_trot43.c3d	1	-0.276226	0.282167	0.000447	-15.8266	16.167	31.9936	0.0256112		-	2	-0.026583	0.30598	0.143275	-1.52309	17.5314	19.0545	8.20905		-	2	-0.289667	0.290045	0.005315	-16.5967	16.6184	33.2151	0.304527
-	2	-0.240798	0.332294	0.051154	-13.7967	19.039	32.8358	2.93091		-	2	-0.281666	0.268346	-0.007594	-16.1383	15.3751	31.5134	-0.435104		Queba_day3_trot12.c3d	1	-0.212959	0.320881	0.061645	-12.2017	18.3851	30.5868	3.532		Queba_day3_trot12.c3d	1	-0.314977	0.281694	-0.013949	-18.0469	16.1399	34.1867	-0.799219
Queba_day3_trot13.c3d	1	-0.308186	0.233042	-0.041755	-17.6578	13.3523	31.0101	-2.39239		Queba_day3_trot12.c3d	1	-0.30333	0.281301	-0.00853	-17.3795	16.1174	33.4969	-0.488733		Queba_day3_trot13.c3d	1	-0.229032	0.334354	0.069279	-13.1226	19.1571	32.2796	3.96939		Queba_day3_trot13.c3d	1	-0.298193	0.289295	0.001971	-17.0852	16.5754	33.6606	0.11293
-	2	-0.31875	0.247526	-0.044309	-18.263	14.1822	32.4452	-2.53872		-	2	-0.321232	0.304952	-0.000471	-18.4052	17.4725	35.8777	-0.0269863		Queba_day3_trot14.c3d	1	-0.189249	0.346186	0.083044	-10.8432	19.835	30.6782	4.75807		Queba_day3_trot14.c3d	1	-0.304447	0.307568	0.001797	-17.4435	17.6223	35.0659	0.102961
Queba_day3_trot14.c3d	1	-0.330642	0.237796	-0.053239	-18.9444	13.6247	32.5691	-3.05037		Queba_day3_trot13.c3d	1	-0.335948	0.275657	-0.023137	-19.2484	15.794	35.0424	-1.32565		Queba_day3_trot15.c3d	1	-0.276856	0.37495	0.054212	-15.8627	21.4831	37.3457	3.10612		Queba_day3_trot15.c3d	1	-0.393397	0.358092	-0.012181	-22.54	20.5172	43.0571	-0.69792
-	2	-0.181587	0.310991	0.073873	-10.4042	17.8185	28.2226	4.23261		Queba_day3_trot14.c3d	1	-0.33887	0.272907	-0.028312	-19.4158	15.6364	35.0522	-1.62216		Queba_day3_trot16.c3d	1	-0.266045	0.364197	0.050725	-15.2433	20.867	36.1102	2.90633		Queba_day3_trot16.c3d	1	-0.369163	0.355157	-0.003706	-21.1515	20.349	41.5005	-0.212338
Queba_day3_trot15.c3d	1	-0.302971	0.329682	0.007814	-17.359	18.8894	36.2483	0.447709		-	2	-0.349354	0.277346	-0.043942	-20.0165	15.8908	35.9073	-2.51769		Queba_day3_trot21.c3d	1	-0.287742	0.361378	0.04044	-16.4864	20.7054	37.1918	2.31704		Queba_day3_trot21.c3d	1	-0.402089	0.352757	-0.023731	-23.038	20.2115	43.2495	-1.35969
Queba_day3_trot16.c3d	1	-0.352091	0.283688	-0.035113	-20.1733	16.2541	36.4275	-2.01183		Queba_day3_trot15.c3d	1	-0.390709	0.342297	-0.016642	-22.386	19.6122	41.9982	-0.953516		Queba_day3_trot23.c3d	1	-0.238793	0.358542	0.067784	-13.6818	20.5429	34.2248	3.88374		Queba_day3_trot23.c3d	1	-0.334418	0.356439	0.01426	-19.1607	20.4225	39.5832	0.817038
Queba_day3_trot21.c3d	1	-0.329551	0.301638	-0.016132	-18.8819	17.2826	36.1645	-0.924296		Queba_day3_trot16.c3d	1	-0.396681	0.309003	-0.041429	-22.7281	17.7046	40.4327	-2.37371		Queba_day3_trot24.c3d	1	-0.266962	0.363441	0.060881	-15.2958	20.8236	36.1194	3.48822		Queba_day3_trot24.c3d	1	-0.356102	0.357922	0.005414	-20.4031	20.5074	40.9106	0.310199
Queba_day3_trot23.c3d	1	-0.244529	0.337781	0.049094	-14.0105	19.3534	33.3639	2.81288		Queba_day3_trot21.c3d	1	-0.454667	0.325996	-0.060971	-26.0505	18.6782	44.7287	-3.49338		Queba_day3_trot26.c3d	1	-0.248898	0.315286	0.038142	-14.2608	18.0646	32.3254	2.18538		Queba_day3_trot26.c3d	1	-0.328962	0.356373	0.021863	-18.8481	20.4187	39.2668	1.25266
Queba_day3_trot24.c3d	1	-0.341903	0.292261	-0.029086	-19.5896	16.7453	36.3349	-1.66651		Queba_day3_trot23.c3d	1	-0.380221	0.295093	-0.040986	-21.7851	16.9076	38.6926	-2.34832		Queba_day3_trot27.c3d	1	-0.26062	0.373576	0.057514	-14.9324	21.4043	36.3368	3.29531		Queba_day3_trot27.c3d	1	-0.350929	0.360282	0.015177	-20.1068	20.6426	40.7494	0.869578
Queba_day3_trot26.c3d	1	-0.281461	0.340617	0.033315	-16.1265	19.5159	35.6424	1.90881		Queba_day3_trot24.c3d	1	-0.390224	0.28169	-0.049857	-22.3582	16.1396	38.4978	-2.8566		Queba_day3_trot28.c3d	1	-0.277283	0.322676	0.030308	-15.8871	18.488	34.3751	1.73652		Queba_day3_trot28.c3d	1	-0.307178	0.329638	0.016883	-17.6	18.8869	36.4869	0.967325
Queba_day3_trot27.c3d	1	-0.33239	0.284799	-0.027365	-19.0445	16.3178	35.3623	-1.5679		Queba_day3_trot26.c3d	1	-0.372465	0.30985	-0.027296	-21.3407	17.7531	39.0938	-1.56395		-	2	-0.276636	0.342417	0.042212	-15.8501	19.619	35.4691	2.41857		-	2	-0.284393	0.331999	0.027006	-16.2945	19.0221	35.3167	1.54733
-	2	-0.266634	0.327355	0.033842	-15.277	18.7561	34.0331	1.939		Queba_day3_trot27.c3d	1	-0.417132	0.294247	-0.062849	-23.8999	16.8591	40.759	-3.60098		Queba_day3_trot29.c3d	1	-0.340285	0.390962	0.036352	-19.4969	22.4005	41.8974	2.08282		Queba_day3_trot29.c3d	1	-0.459677	0.350976	-0.055479	-26.3376	20.1094	46.447	-3.17871
Queba_day3_trot28.c3d	1	-0.328948	0.256356	-0.036649	-18.8473	14.6881	33.5354	-2.09983		-	2	-0.392577	0.293339	-0.04902	-22.493	16.8071	39.3001	-2.80864		Queba_day3_trot6.c3d	1	-0.18896	0.316851	0.072323	-10.8266	18.1542	28.9808	4.1438		Queba_day3_trot6.c3d	1	-0.285983	0.282123	-0.000754	-16.3856	16.1645	32.5501	-0.043201
Queba_day3_trot29.c3d	1	-0.354593	0.33708	-0.013342	-20.3167	19.3133	39.6299	-0.76444		Queba_day3_trot28.c3d	1	-0.368992	0.28744	-0.037687	-21.1417	16.4691	37.6108	-2.15931		Queba_day3_trot7.c3d	1	-0.175209	0.351969	0.097981	-10.0387	20.1663	30.2051	5.6139		Queba_day3_trot7.c3d	1	-0.311377	0.308124	-0.003626	-17.8406	17.6542	35.4948	-0.207754
Queba_day3_trot30.c3d	1	-0.401311	0.322544	-0.041739	-22.9934	18.4804	41.4738	-2.39147		Queba_day3_trot29.c3d	1	-0.477704	0.363647	-0.049562	-27.3704	20.8354	48.2059	-2.83969		-	2	-0.201308	0.321469	0.068461	-11.5341	18.4188	29.9529	3.92253		-	2	-0.289189	0.330069	0.022199	-16.5693	18.9116	35.4809	1.27191
Queba_day3_trot6.c3d	1	-0.213606	0.320931	0.059267	-12.2387	18.388	30.6267	3.39575		Queba_day3_trot30.c3d	1	-0.471811	0.347694	-0.058518	-27.0328	19.9214	46.9542	-3.35283		Queba_Day4_passage10.c3d	1	-0.020235	0.002512	-0.014827	-1.15938	0.143927	1.30331	-0.849525		Queba_Day4_passage10.c3d	1	0.152081	0.219835	0.16101	8.7136	12.5956	3.88202	9.22519
-	2	-0.219233	0.309228	0.049226	-12.5611	17.7175	30.2786	2.82044		Queba_day3_trot6.c3d	1	-0.322959	0.220401	-0.047272	-18.5042	12.628	31.1322	-2.70849		-	2	-0.035704	-0.01316	-0.023533	-2.04569	-0.754012	1.29168	-1.34834		-	2	0.090554	0.134793	0.101069	5.18836	7.72307	2.53471	5.79083
Queba_day3_trot7.c3d	1	-0.312532	0.199477	-0.057725	-17.9068	11.4292	29.336	-3.3074		-	2	-0.304103	0.271293	-0.009542	-17.4238	15.5439	32.9678	-0.546716		-	3	0.004749	0.052474	0.022717	0.272098	3.00654	2.73444	1.30159		-	3	0.135034	0.173306	0.146838	7.73688	9.9297	2.19282	8.4132
Queba_Day4_passage10.c3d	1	-0.062911	-0.021497	-0.035991	-3.60453	-1.23169	2.37285	-2.06213		Queba_day3_trot7.c3d	1	-0.343017	0.279782	-0.029622	-19.6534	16.0303	35.6838	-1.69722		Queba_Day4_piaffe11.c3d	1	-0.059408	0.055606	0.004502	-3.40383	3.18599	6.58982	0.257946		Queba_Day4_piaffe11.c3d	1	0.04251	0.197118	0.114411	2.43564	11.294	8.85839	6.55527
-	2	0.009022	0.034912	0.01639	0.516923	2.00031	1.48339	0.939078		Queba_Day4_passage10.c3d	1	0.113877	0.180763	0.136724	6.52467	10.357	3.83229	7.83371		-	2	-0.005989	0.110601	0.056538	-0.343144	6.33697	6.68011	3.23939		-	2	0.060057	0.200618	0.117636	3.44101	11.4946	8.05355	6.74005
-	3	-0.000978	0.040775	0.013525	-0.0560353	2.33624	2.39227	0.774925		-	2	0.136065	0.179582	0.144315	7.79595	10.2893	2.49334	8.26864
Queba_Day4_piaffe11.c3d	1	-0.077414	0.067512	-0.022832	-4.4355	3.86815	8.30365	-1.30818		-	3	0.08426	0.151762	0.106221	4.82774	8.69532	3.86758	6.08601		-	3	-0.00607	0.056447	0.025168	-0.347785	3.23417	3.58196	1.44202		-	3	0.153215	0.266051	0.193351	8.77857	15.2436	6.46503	11.0782
-	2	-0.011789	0.154377	0.04008	-0.67546	8.84515	9.52061	2.29641		Queba_Day4_piaffe11.c3d	1	0.070448	0.177701	0.118179	4.03637	10.1815	6.14514	6.77116		-	4	-0.034681	0.006337	-0.010576	-1.98707	0.363083	2.35016	-0.60596		-	4	0.045686	0.127122	0.073806	2.61761	7.28355	4.66594	4.22877
-	3	-0.036507	0.054893	-0.001217	-2.0917	3.14514	5.23683	-0.069729		-	2	0.051658	0.183823	0.100083	2.95979	10.5323	7.5725	5.73433		-	5	0.008924	0.060469	0.037786	0.511308	3.46462	2.95331	2.16498		-	5	0.084289	0.155823	0.115223	4.8294	8.928	4.0986	6.60179
-	4	0.002947	0.046426	0.016915	0.168851	2.66001	2.49116	0.969158		-	3	0.110392	0.187658	0.141236	6.325	10.752	4.42702	8.09223		-	6	-0.025582	0.012527	-0.012292	-1.46574	0.717744	2.18348	-0.70428		-	6	0.123108	0.175027	0.137147	7.05357	10.0283	2.97474	7.85794
-	5	0.016479	0.057825	0.028471	0.944177	3.31313	2.36895	1.63127		-	4	0.136675	0.188606	0.154965	7.8309	10.8063	2.97543	8.87884		-	7	-0.011213	0.017939	0.000264	-0.642458	1.02783	1.67029	0.0151261		-	7	0.17987	0.259994	0.192865	10.3058	14.8966	4.59077	11.0504
-	6	0.004749	0.041927	0.011675	0.272098	2.40224	2.13014	0.668928		-	5	0.151505	0.224496	0.174575	8.6806	12.8627	4.18208	10.0024		Queba_Day4_piaffe3.c3d	1	-0.040285	0.051065	0.003467	-2.30816	2.92581	5.23397	0.198644		Queba_Day4_piaffe3.c3d	1	0.037124	0.094825	0.066753	2.12705	5.43307	3.30602	3.82467
-	7	0.007954	0.044609	0.019261	0.455731	2.55591	2.10018	1.10357		-	6	0.166078	0.211361	0.178116	9.51557	12.1101	2.59452	10.2053		-	2	-0.021091	0.100184	0.034194	-1.20843	5.74012	6.94855	1.95917		-	2	0.011524	0.147055	0.083196	0.660277	8.42563	7.76535	4.76678
-	8	-0.034447	-0.012624	-0.02725	-1.97367	-0.723302	1.25037	-1.56131		-	7	0.183989	0.24621	0.194036	10.5418	14.1068	3.565	11.1174		-	3	-0.056656	0.058512	-0.003356	-3.24615	3.35249	6.59864	-0.192285		-	3	0.028436	0.134714	0.067681	1.62926	7.71854	6.08928	3.87784
Queba_Day4_piaffe3.c3d	1	-0.087162	0.024808	-0.01966	-4.99401	1.42139	6.41541	-1.12644		-	8	0.16502	0.218769	0.180799	9.45495	12.5345	3.07959	10.359		-	4	-0.058625	0.026535	-0.015175	-3.35897	1.52034	4.87931	-0.869463		-	4	0.043427	0.178626	0.100123	2.48818	10.2345	7.74633	5.73663
-	2	-0.043199	0.079223	0.002922	-2.47512	4.53914	7.01426	0.167418		Queba_Day4_piaffe3.c3d	1	0.0136	0.16172	0.071924	0.779223	9.26587	8.48665	4.12094		-	5	-0.042506	-0.026864	-0.035429	-2.43541	-1.53919	0.896221	-2.02993		-	5	0.111926	0.164402	0.136831	6.41289	9.41954	3.00665	7.83984
-	3	-0.023439	0.082501	0.011286	-1.34296	4.72696	6.06991	0.64664		-	2	0.123766	0.23459	0.172005	7.09127	13.441	6.34975	9.85516		-	6	-0.047516	0.044313	-0.007056	-2.72247	2.53895	5.26141	-0.404279		-	6	0.02459	0.169238	0.076302	1.4089	9.69662	8.28772	4.37178
-	4	-0.037929	0.132631	0.026503	-2.17317	7.5992	9.77237	1.51851		-	3	0.150444	0.263639	0.187328	8.61981	15.1054	6.4856	10.7331		Queba_Day4_piaffe7.c3d	1	-0.046466	-0.006408	-0.029277	-2.66231	-0.367151	2.29515	-1.67745		Queba_Day4_piaffe7.c3d	1	0.150786	0.21255	0.170757	8.6394	12.1782	3.53882	9.78366
-	5	0.029402	0.074212	0.041286	1.68461	4.25203	2.56742	2.36551		-	4	0.057745	0.188026	0.110384	3.30854	10.7731	7.46455	6.32454		-	2	-0.025873	0.050716	0.003143	-1.48241	2.90581	4.38823	0.180081		-	2	0.095647	0.183396	0.119153	5.48017	10.5078	5.02765	6.82696
-	6	-0.071142	0.149218	0.01033	-4.07614	8.54956	12.6257	0.591865		-	5	0.10179	0.133808	0.107679	5.83214	7.66663	1.8345	6.16955		-	3	-0.004665	0.044867	0.007372	-0.267285	2.57069	2.83797	0.422384		-	3	0.064354	0.146521	0.07743	3.68721	8.39503	4.70782	4.43641
Queba_Day4_piaffe7.c3d	1	-0.050226	0.016548	-0.025943	-2.87774	0.948131	3.82587	-1.48642		Queba_Day4_piaffe7.c3d	1	0.1232	0.207708	0.149331	7.05884	11.9008	4.84195	8.55604		tando_passage4.c3d	1	-0.064172	0.295117	0.105716	-3.67678	16.909	20.5857	6.05708		tando_passage4.c3d	1	-0.082395	0.298093	0.111599	-4.72089	17.0795	21.8004	6.39415
-	2	-0.019017	0.068375	-0.005354	-1.08959	3.9176	5.00719	-0.306762		-	2	0.164665	0.209102	0.173479	9.43461	11.9807	2.54605	9.93961		tando_piaffe10.c3d	1	-0.071817	0.067059	-0.002191	-4.11481	3.8422	7.95701	-0.125535		tando_piaffe10.c3d	1	0.026727	0.199008	0.133852	1.53134	11.4023	9.87097	7.66915
tando_piaffe10.c3d	1	-0.062679	0.146767	0.022178	-3.59124	8.40913	12.0004	1.27071		tando_piaffe10.c3d	1	0.092208	0.212172	0.146641	5.28313	12.1566	6.87343	8.40191		-	2	-0.052149	0.178774	0.05237	-2.98792	10.243	13.2309	3.00058		-	2	-0.054015	0.181164	0.060632	-3.09483	10.3799	13.4748	3.47396
-	2	-0.003408	0.164861	0.068194	-0.195264	9.44584	9.6411	3.90723		-	2	0.104654	0.254676	0.166996	5.99623	14.5919	8.59563	9.56817			3	0.081893	0.134346	0.108453	4.69212	7.69746	3.00534	6.2139			3	0.023155	0.187317	0.09717	1.32668	10.7325	9.40579	5.56743
																				-	4	0.077892	0.106273	0.09132	4.46288	6.08899	1.62611	5.23225		-	4	0.065133	0.202794	0.131449	3.73185	11.6192	7.88739	7.53147
-	3	-0.025015	0.123806	0.034584	-1.43325	7.09356	8.52682	1.98152		-	3	0.046761	0.230854	0.12391	2.67921	13.227	10.5478	7.09952		tando_piaffe15.c3d	1	-0.135727	0.328691	0.094747	-7.77658	18.8326	26.6092	5.4286		tando_piaffe15.c3d	1	-0.238116	0.263026	0.003006	-13.643	15.0703	28.7133	0.172231
tando_piaffe13_2.c3d	1	-0.141506	0.119565	-0.010941	-8.1077	6.85057	14.9583	-0.626873		tando_piaffe13_2.c3d	1	-0.090855	0.25106	0.079481	-5.20561	14.3847	19.5903	4.55393		-	2	-0.189576	0.318202	0.043154	-10.8619	18.2316	29.0935	2.47254		-	2	-0.242813	0.259157	0.010281	-13.9122	14.8486	28.7608	0.589058
tando_piaffe15.c3d	1	-0.164425	0.317161	0.063648	-9.42086	18.172	27.5928	3.64676		tando_piaffe15.c3d	1	-0.236422	0.278457	0.017759	-13.546	15.9544	29.5004	1.01752		tando_piaffe17.c3d	1	-0.04886	0.066834	-0.002581	-2.79947	3.82931	6.62878	-0.14788		tando_piaffe17.c3d	1	0.078804	0.215084	0.151826	4.51514	12.3234	7.80827	8.69899
-	2	-0.233261	0.264106	0.024363	-13.3649	15.1322	28.497	1.3959		-	2	-0.248092	0.23037	-0.004624	-14.2146	13.1992	27.4139	-0.264936		Remove!	2									Remove!	2
tando_piaffe17.c3d	1	0.009822	0.0481	0.02729	0.562759	2.75593	2.19317	1.5636		tando_piaffe17.c3d	1	0.089468	0.259196	0.172573	5.12614	14.8508	9.7247	9.8877		tando_piaffe3.c3d	1	-0.049243	0.063876	-0.000913	-2.82142	3.65983	6.48124	-0.052311		tando_piaffe3.c3d	1	0.064185	0.209719	0.130636	3.67753	12.016	8.33848	7.48489
-	2	-0.024572	0.067235	0.00602	-1.40787	3.85228	5.26015	0.344921		-	2	0.274236	0.374012	0.317839	15.7126	21.4293	5.71674	18.2108		-	2	-0.051707	0.052865	-0.008269	-2.96259	3.02894	5.99153	-0.473779		-	2	0.023095	0.201573	0.108475	1.32325	11.5493	10.226	6.21516
tando_piaffe3.c3d	1	-0.119197	0.050214	-0.053425	-6.82949	2.87705	9.70654	-3.06103		tando_piaffe3.c3d	1	0.052898	0.18868	0.115187	3.03083	10.8106	7.77974	6.59973		-	3	-0.054772	0.07327	-0.00334	-3.1382	4.19806	7.33627	-0.191368		-	3	0.033687	0.219647	0.129529	1.93012	12.5848	10.6547	7.42147
-	2	-0.064182	0.072434	-0.023571	-3.67736	4.15016	7.82752	-1.35052		-	2	0.106511	0.258902	0.162771	6.10263	14.834	8.73136	9.32609		-	4	-0.035528	0.044793	0.001033	-2.0356	2.56645	4.60205	0.0591865		-	4	0.162691	0.249341	0.20292	9.32151	14.2862	4.96468	11.6265
-	3	-0.081117	0.060228	-0.025772	-4.64766	3.45081	8.09847	-1.47663		-	3	0.115466	0.232665	0.171737	6.61571	13.3307	6.71501	9.83981		Tando_trot2s.c3d	1	-0.296766	0.362283	0.033596	-17.0034	20.7573	37.7607	1.92491		Tando_trot2s.c3d	1	-0.343695	0.378058	0.030944	-19.6923	21.6611	41.3534	1.77296
-	4	-0.09144	-0.004856	-0.065984	-5.23913	-0.278228	4.9609	-3.7806		-	4	0.188647	0.264804	0.221945	10.8087	15.1722	4.36347	12.7165		Tando_trot3s.c3d	1	-0.313411	0.351274	0.019893	-17.9571	20.1265	38.0836	1.13978		Tando_trot3s.c3d	1	-0.32556	0.358399	0.023963	-18.6532	20.5348	39.188	1.37298
Tando_trot2s.c3d	1	-0.33718	0.333032	-0.003887	-19.319	19.0813	38.4003	-0.222709		Tando_trot2s.c3d	1	-0.370459	0.424609	0.044829	-21.2257	24.3283	45.554	2.56851		Tando_trot4.c3d	1	-0.296586	0.371733	0.040495	-16.9931	21.2987	38.2919	2.32019		Tando_trot4.c3d	1	-0.304668	0.362218	0.030216	-17.4562	20.7536	38.2098	1.73125
Tando_trot3s.c3d	1	-0.360223	0.359921	-0.000794	-20.6393	20.622	41.2612	-0.0454928		Tando_trot3s.c3d	1	-0.327173	0.392279	0.043841	-18.7456	22.4759	41.2216	2.5119		Tando_trot6s.c3d	1	-0.288745	0.349038	0.03029	-16.5439	19.9984	36.5423	1.73549		Tando_trot6s.c3d	1	-0.296458	0.361018	0.041626	-16.9858	20.6848	37.6706	2.38499
Tando_trot4.c3d	1	-0.36911	0.327282	-0.023156	-21.1484	18.7519	39.9003	-1.32674		Tando_trot4.c3d	1	-0.315861	0.392666	0.050896	-18.0975	22.4981	40.5956	2.91613		-	2	-0.306554	0.366746	0.027425	-17.5643	21.013	38.5772	1.57134		-	2	-0.318962	0.361001	0.026005	-18.2752	20.6838	38.959	1.48998
Tando_trot6s.c3d	1	-0.332065	0.351324	0.008543	-19.0259	20.1294	39.1553	0.489478		Tando_trot6s.c3d	1	-0.301781	0.383265	0.053357	-17.2908	21.9595	39.2502	3.05713		Tando_trot7s.c3d	1	-0.300081	0.347882	0.023428	-17.1934	19.9322	37.1255	1.34233		Tando_trot7s.c3d	1	-0.34088	0.352474	0.01321	-19.531	20.1953	39.7263	0.756877
Tando_trot7s.c3d	1	-0.353165	0.332341	-0.012302	-20.2349	19.0417	39.2766	-0.704853		Tando_trot7s.c3d	1	-0.325709	0.385422	0.038435	-18.6618	22.0831	40.7448	2.20216		Tando_trot8s.c3d	1	-0.307523	0.350029	0.018704	-17.6198	20.0552	37.675	1.07166		Tando_trot8s.c3d	1	-0.254164	0.357825	0.060322	-14.5625	20.5019	35.0644	3.4562

## Sheet: EFFECTIVE LL
Limb lengths calculated fron ON to MIN change in length
EFFECTIVE LIMB LENGTH LFON			EFF LIMB LENGTH MIN LF			Change in length (mm)	Dif between min and standing (%)		EFFECTIVE LIMB LENGTH RHON			EFF LIMB LENGTH MIN RH			Change in length (mm)	Dif between min and standing (%)	EFFECTIVE LIMB LENGTH RFON			EFF LIMB LENGTH MIN RF			Change in length (mm)	Dif between min and standing (%)	EFFECTIVE LIMB LENGTH LHON			EFF LIMB LENGTH MIN LH			Change in length (mm)	Dif between min and standing (%)
File	Item	X	File	Item	X				File	Item	X	File	Item	X			File	Item	X	File	Item	X			File	Item	X	File	Item	X
Passage1.c3d	1	1.35	Passage1.c3d	1	1.28393	66.071	3.073		Passage1.c3d	1	1.28684	Passage1.c3d	1	1.23584	51.006	5.85835	Passage1.c3d	1	1.37354	Passage1.c3d	1	1.3045	69.047	2.22305	Passage1.c3d	1	1.27138	Passage1.c3d	1	1.21455	56.836	4.95884
Passage3.c3d	1	1.35313	Passage3.c3d	1	1.26994	83.19	4.12929		Passage3.c3d	1	1.28844	Passage3.c3d	1	1.24073	47.712	5.48547	Passage3.c3d	1	1.3746	Passage3.c3d	1	1.29068	83.92	3.25861	Passage3.c3d	1	1.2777	Passage3.c3d	1	1.21125	66.454	5.217
-	2	1.34719	-	2	1.26995	77.237	4.12845		-	2	1.30085	-	2	1.23023	70.617	6.28532	-	2	1.3677	-	2	1.2841	83.603	3.75189	-	2	1.27187	-	2	1.21315	58.722	5.06824
Passage4.c3d	1	1.32909	Passage4.c3d	1	1.257	72.083	5.10586		Passage4.c3d	1	1.27526	Passage4.c3d	1	1.20278	72.475	8.37629	Passage4.c3d	1	1.36802	Passage4.c3d	1	1.28503	82.997	3.6824	Passage4.c3d	1	1.26338	Passage4.c3d	1	1.1788	84.578	7.75613
-	2	1.33367	-	2	1.2513	82.375	5.53654		-	2	1.27125	-	2	1.2049	66.35	8.21487	-	2	1.35141	-	2	1.29466	56.741	2.96	-	2	1.26671	-	2	1.21315	53.56	5.06832
Trot6.c3d	1	1.31197	Trot6.c3d	1	1.28239	29.58	3.18933		Trot6.c3d	1	1.28209	Trot6.c3d	1	1.24232	39.768	5.36412	Trot6.c3d	1	1.34849	Trot6.c3d	1	1.29667	51.821	2.80994	Trot6.c3d	1	1.26022	Trot6.c3d	1	1.23136	28.863	3.64342
-	2	1.31586	-	2	1.27962	36.244	3.39852		-	2	1.2755	-	2	1.24948	26.019	4.819	Trot7.c3d	1	1.34222	Trot7.c3d	1	1.30075	41.467	2.50398	Trot7.c3d	1	1.26048	Trot7.c3d	1	1.23255	27.927	3.54991
Trot7.c3d	1	1.30452	Trot7.c3d	1	1.28059	23.929	3.32476		Trot7.c3d	1	1.29139	Trot7.c3d	1	1.24954	41.851	4.81458	Queba_day2_piaffe3.c3d	1	1.37854	Queba_day2_piaffe3.c3d	1	1.28379	94.749	3.77542	Queba_day2_piaffe3.c3d	1	1.32342	Queba_day2_piaffe3.c3d	1	1.23117	92.251	6.15966
-	2	1.30942	-	2	1.28237	27.051	3.19084		-	2	1.286	-	2	1.25561	30.386	4.35173	-	2	1.36393	-	2	1.28387	80.059	3.76927	-	2	1.33538	-	2	1.22126	114.122	6.91539
Queba_day2_piaffe3.c3d	1	1.36596	Queba_day2_piaffe3.c3d	1	1.28596	79.999	4.57299		Queba_day2_piaffe3.c3d	1	1.30014	Queba_day2_piaffe3.c3d	1	1.21466	85.48	7.40777	Queba_day2_piaffe44.c3d	1	1.34581	Queba_day2_piaffe44.c3d	1	1.29016	55.646	5.10494	Queba_day2_piaffe44.c3d	1	1.27799	Queba_day2_piaffe44.c3d	1	1.23987	38.117	5.49655
Queba_day2_piaffe44.c3d	1	1.33991	Queba_day2_piaffe44.c3d	1	1.29236	47.544	4.09799		Queba_day2_piaffe44.c3d	1	1.28413	Queba_day2_piaffe44.c3d	1	1.22209	62.036	6.84101	Queba_day2_piaffe45.c3d	1	1.29846	Queba_day2_piaffe45.c3d	1	1.27536	23.105	6.19375	Queba_day2_piaffe45.c3d	1	1.20856	Queba_day2_piaffe45.c3d	1	1.17147	37.083	10.71
Queba_day2_piaffe45.c3d	1	1.30346	Queba_day2_piaffe45.c3d	1	1.25465	48.81	6.89677		Queba_day2_piaffe45.c3d	1	1.24215	Queba_day2_piaffe45.c3d	1	1.17183	70.321	10.6725	Queba_day2_piaffe46.c3d	1	1.3362	Queba_day2_piaffe46.c3d	1	1.27899	57.207	5.92638	Queba_day2_piaffe46.c3d	1	1.2538	Queba_day2_piaffe46.c3d	1	1.22791	25.894	6.40852
Queba_day2_piaffe47.c3d	1	1.26271	Queba_day2_piaffe47.c3d	1	1.23022	32.497	8.70978		Queba_day2_piaffe47.c3d	1	1.23312	Queba_day2_piaffe47.c3d	1	1.18728	45.844	9.4953	Queba_day2_piaffe47.c3d	1	1.28206	Queba_day2_piaffe47.c3d	1	1.23246	49.598	9.34858	Queba_day2_piaffe47.c3d	1	1.24102	Queba_day2_piaffe47.c3d	1	1.18559	55.432	9.63424
Queba_day2_piaffe49.c3d	1	1.33936	Queba_day2_piaffe49.c3d	1	1.29017	49.188	4.26058		Queba_day2_piaffe49.c3d	1	1.2947	Queba_day2_piaffe49.c3d	1	1.22458	70.127	6.65189	Queba_day2_piaffe49.c3d	1	1.3475	Queba_day2_piaffe49.c3d	1	1.29357	53.927	4.8542	Queba_day2_piaffe49.c3d	1	1.28022	Queba_day2_piaffe49.c3d	1	1.24861	31.603	4.83038
Queba_day2_piaffe50.c3d	1	1.3276	Queba_day2_piaffe50.c3d	1	1.28534	42.254	4.61892		Queba_day2_piaffe50.c3d	1	1.24421	Queba_day2_piaffe50.c3d	1	1.20147	42.737	8.41323	-	2	1.33291	-	2	1.28465	48.26	5.51	-	2	1.28107	-	2	1.25131	29.759	4.62466
-	2	1.32475	-	2	1.27899	45.759	5.09021		-	2	1.27784	-	2	1.22412	53.716	6.68665	Queba_day2_piaffe50.c3d	1	1.32222	Queba_day2_piaffe50.c3d	1	1.28099	41.233	5.77935	Queba_day2_piaffe50.c3d	1	1.27277	Queba_day2_piaffe50.c3d	1	1.25115	21.625	4.63724
Queba_day2_piaffe51.c3d	1	1.27865	Queba_day2_piaffe51.c3d	1	1.25522	23.435	6.85462		Queba_day2_piaffe51.c3d	1	1.25607	Queba_day2_piaffe51.c3d	1	1.19324	62.824	9.04022	Queba_day2_piaffe51.c3d	1	1.27771	Queba_day2_piaffe51.c3d	1	1.24565	32.052	8.37842	Queba_day2_piaffe51.c3d	1	1.23551	Queba_day2_piaffe51.c3d	1	1.20067	34.832	8.48438
Queba_day2_piaffe55.c3d	1	1.26724	Queba_day2_piaffe55.c3d	1	1.24118	26.066	7.89648		Queba_day2_piaffe55.c3d	1	1.2473	Queba_day2_piaffe55.c3d	1	1.18101	66.293	9.97288	Queba_day2_piaffe53.c3d	1	1.27159	Queba_day2_piaffe53.c3d	1	1.23904	32.555	8.86534	Queba_day2_piaffe53.c3d	1	1.23696	Queba_day2_piaffe53.c3d	1	1.19894	38.022	8.61685
Queba_day2_piaffe56.c3d	1	1.27858	Queba_day2_piaffe56.c3d	1	1.24108	37.503	7.90368		Queba_day2_piaffe56.c3d	1	1.24019	Queba_day2_piaffe56.c3d	1	1.19135	48.843	9.1849	Queba_day2_piaffe55.c3d	1	1.28209	Queba_day2_piaffe55.c3d	1	1.22612	55.976	9.81542	Queba_day2_piaffe55.c3d	1	1.20925	Queba_day2_piaffe55.c3d	1	1.17317	36.075	10.5805
Queba_day2_piaffe6.c3d	1	1.36866	Queba_day2_piaffe6.c3d	1	1.27781	90.848	5.17784		Queba_day2_piaffe6.c3d	1	1.3126	Queba_day2_piaffe6.c3d	1	1.20598	106.623	8.06975	Queba_day2_piaffe56.c3d	1	1.28698	Queba_day2_piaffe56.c3d	1	1.2436	43.382	8.52993	Queba_day2_piaffe56.c3d	1	1.2158	Queba_day2_piaffe56.c3d	1	1.19047	25.328	9.26168
Queba_day2_piaffe7.c3d	1	1.38153	Queba_day2_piaffe7.c3d	1	1.29041	91.117	4.24291		Queba_day2_piaffe7.c3d	1	1.29594	Queba_day2_piaffe7.c3d	1	1.22094	75.005	6.92929	Queba_day2_piaffe6.c3d	1	1.38947	Queba_day2_piaffe6.c3d	1	1.28775	101.722	5.28213	Queba_day2_piaffe6.c3d	1	1.30669	Queba_day2_piaffe6.c3d	1	1.22811	78.585	6.39328
-	2	1.37643	-	2	1.28956	86.869	4.30599		-	2	1.30648	-	2	1.22943	77.043	6.28157	Queba_day2_piaffe7.c3d	1	1.38281	Queba_day2_piaffe7.c3d	1	1.27676	106.054	6.09092	Queba_day2_piaffe7.c3d	1	1.31587	Queba_day2_piaffe7.c3d	1	1.22338	92.49	6.7535
Quemacho_day2_walk10.c3d	1	1.33752	Quemacho_day2_walk10.c3d	1	1.32831	9.216	1.11356		Quemacho_day2_walk10.c3d	1	1.19569	Quemacho_day2_walk10.c3d	1	1.2293	-33.61	6.29178	-	2	1.37945	-	2	1.29105	88.396	5.03919	-	2	1.31317	-	2	1.2295	83.67	6.28688
Quemacho_day2_walk12.c3d	1	1.30696	Quemacho_day2_walk12.c3d	1	1.27715	29.809	4.92212		Quemacho_day2_walk12.c3d	1	1.2881	Quemacho_day2_walk12.c3d	1	1.23458	53.52	3.79669	Quemacho_day2_walk10.c3d	1	1.32665	Quemacho_day2_walk10.c3d	1	1.3391	-12.452	1.3672	Quemacho_day2_walk10.c3d	1	1.25215	Quemacho_day2_walk10.c3d	1	1.22104	31.105	5.79121
Quemacho_day2_walk42.c3d	1	1.33641	Quemacho_day2_walk42.c3d	1	1.31355	22.86	2.21208		Quemacho_day2_walk42.c3d	1	1.24399	Quemacho_day2_walk42.c3d	1	1.22409	19.899	4.61404	-	2	1.33438	-	2	1.3419	-7.517	1.16097	-	2	1.22124	-	2	1.17165	49.586	9.60171
-	2	1.31277	-	2	1.3133	-0.532	2.23061		-	2	1.24728	-	2	1.23923	8.053	3.43458	Quemacho_day2_walk12.c3d	1	1.3295	Quemacho_day2_walk12.c3d	1	1.29112	38.381	4.90129	Quemacho_day2_walk12.c3d	1	1.28416	Quemacho_day2_walk12.c3d	1	1.23358	50.58	4.82362
Quemacho_day2_walk49.c3d	1								Quemacho_day2_walk49.c3d	1	1.27946	Quemacho_day2_walk49.c3d	1	1.21928	60.181	4.98854	Quemacho_day2_walk42.c3d	1		Quemacho_day2_walk42.c3d	1				Quemacho_day2_walk42.c3d	1	1.28052	Quemacho_day2_walk42.c3d	1	1.22273	57.787	5.66082
Quemacho_day2_walk50.c3d	1								Quemacho_day2_walk50.c3d	1	1.25561	Quemacho_day2_walk50.c3d	1	1.20164	53.971	6.36336	-	2		-	2				-	2	1.27334	-	2	1.23004	43.3	5.09705
Quemacho_day3_trot29.c3d	1	1.30237	Quemacho_day3_trot29.c3d	1	1.2731	29.265	4.68139		Quemacho_day3_trot29.c3d	1	1.28627	Quemacho_day3_trot29.c3d	1	1.24574	40.525	4.12737	Quemacho_day2_walk49.c3d	1		Quemacho_day2_walk49.c3d	1				Quemacho_day2_walk49.c3d	1	1.24467	Quemacho_day2_walk49.c3d	1	1.19476	49.907	7.81891
-	2	1.29914	-	2	1.27242	26.72	4.73275		-	2	1.2854	-	2	1.24208	43.323	4.40958	Quemacho_day2_walk50.c3d	1		Quemacho_day2_walk50.c3d	1				Quemacho_day2_walk50.c3d	1	1.21976	Quemacho_day2_walk50.c3d	1	1.16745	52.31	9.92592
Quemacho_day3_trot31.c3d	1	1.30426	Quemacho_day3_trot31.c3d	1	1.27188	32.375	4.77273		Quemacho_day3_trot31.c3d	1	1.28188	Quemacho_day3_trot31.c3d	1	1.24289	38.988	4.34694	Quemacho_day3_trot29.c3d	1	1.22889	Quemacho_day3_trot29.c3d	1	1.28109	-52.199	4.93247	Quemacho_day3_trot29.c3d	1	1.26491	Quemacho_day3_trot29.c3d	1	1.22405	40.866	5.98718
-	2	1.29823	-	2	1.27317	25.056	4.67615		-	2	1.28135	-	2	1.2436	37.752	4.29261	Quemacho_day3_trot31.c3d	1	1.32607	Quemacho_day3_trot31.c3d	1	1.2767	49.364	5.25839	Quemacho_day3_trot31.c3d	1	1.26594	Quemacho_day3_trot31.c3d	1	1.22382	42.112	6.00408
Quemacho_day3_trot37.c3d	1	1.3189	Quemacho_day3_trot37.c3d	1	1.27012	48.786	4.90503		Quemacho_day3_trot37.c3d	1	1.2975	Quemacho_day3_trot37.c3d	1	1.23722	60.281	4.78361	Quemacho_day3_trot37.c3d	1	1.32958	Quemacho_day3_trot37.c3d	1	1.28032	49.265	4.9902	Quemacho_day3_trot37.c3d	1	1.27044	Quemacho_day3_trot37.c3d	1	1.22151	48.923	6.18165
-	2	1.3168	-	2	1.27394	42.86	4.61895		-	2	1.29512	-	2	1.24127	53.848	4.47161	Quemacho_day3_trot40.c3d	1	1.33317	Quemacho_day3_trot40.c3d	1	1.28336	49.809	4.76416	Quemacho_day3_trot40.c3d	1	1.26516	Quemacho_day3_trot40.c3d	1	1.2269	38.263	5.76806
Quemacho_day3_trot40.c3d	1	1.31775	Quemacho_day3_trot40.c3d	1	1.28093	36.824	4.0956		Quemacho_day3_trot40.c3d	1	1.28566	Quemacho_day3_trot40.c3d	1	1.2458	39.853	4.12283	Quemacho_day3_trot42.c3d	1	1.34278	Quemacho_day3_trot42.c3d	1	1.28319	59.588	4.777	Quemacho_day3_trot42.c3d	1	1.27976	Quemacho_day3_trot42.c3d	1	1.22282	56.94	6.08104
-	2	1.31683	-	2	1.27444	42.392	4.58136		-	2	1.27996	-	2	1.24218	37.78	4.40173	-	2	1.34299	-	2	1.28005	62.932	5.00964	-	2	1.27549	-	2	1.23016	45.331	5.51783
Quemacho_day3_trot42.c3d	1	1.32435	Quemacho_day3_trot42.c3d	1	1.27124	53.111	4.82095		Quemacho_day3_trot42.c3d	1	1.28855	Quemacho_day3_trot42.c3d	1	1.24166	46.892	4.44145	Quemacho_day3_trot43.c3d	1	1.33177	Quemacho_day3_trot43.c3d	1	1.28802	43.743	4.41813	Quemacho_day3_trot43.c3d	1	1.27534	Quemacho_day3_trot43.c3d	1	1.22575	49.593	5.85631
Quemacho_day3_trot43.c3d	1	1.31563	Quemacho_day3_trot43.c3d	1	1.28185	33.776	4.02642		Quemacho_day3_trot43.c3d	1	1.2901	Quemacho_day3_trot43.c3d	1	1.24664	43.46	4.05865	-	2	1.33539	-	2	1.28593	49.466	4.57367	-	2	1.26764	-	2	1.2257	41.939	5.86038
-	2	1.3175	-	2	1.27955	37.95	4.1987		-	2	1.2948	-	2	1.24795	46.854	3.95791	Queba_day3_trot12.c3d	1	1.33366	Queba_day3_trot12.c3d	1	1.30241	31.256	4.84774	Queba_day3_trot12.c3d	1	1.29902	Queba_day3_trot12.c3d	1	1.24724	51.781	2.9148
Queba_day3_trot12.c3d	1	1.34332	Queba_day3_trot12.c3d	1	1.296	47.316	3.96385		Queba_day3_trot12.c3d	1	1.29362	Queba_day3_trot12.c3d	1	1.23449	59.125	6.51497	Queba_day3_trot13.c3d	1	1.337	Queba_day3_trot13.c3d	1	1.30073	36.269	4.97055	Queba_day3_trot13.c3d	1	1.30134	Queba_day3_trot13.c3d	1	1.23911	62.23	3.54741
-	2	1.34793	-	2	1.29296	54.967	4.18905		-	2	1.28786	-	2	1.22613	61.736	7.14874	Queba_day3_trot14.c3d	1	1.37181	Queba_day3_trot14.c3d	1	1.30689	64.928	4.52058	Queba_day3_trot14.c3d	1	1.28139	Queba_day3_trot14.c3d	1	1.24926	32.132	2.75741
Queba_day3_trot13.c3d	1	1.34546	Queba_day3_trot13.c3d	1	1.28833	57.134	4.53273		Queba_day3_trot13.c3d	1	1.28985	Queba_day3_trot13.c3d	1	1.23165	58.209	6.73072	Queba_day3_trot15.c3d	1	1.35297	Queba_day3_trot15.c3d	1	1.28305	69.924	6.26208	Queba_day3_trot15.c3d	1	1.22975	Queba_day3_trot15.c3d	1	1.20791	21.839	5.97633
Queba_day3_trot14.c3d	1	1.34421	Queba_day3_trot14.c3d	1	1.29681	47.406	3.90435		Queba_day3_trot14.c3d	1	1.30532	Queba_day3_trot14.c3d	1	1.23353	71.785	6.58782	Queba_day3_trot16.c3d	1	1.31963	Queba_day3_trot16.c3d	1	1.2981	21.527	5.1624	Queba_day3_trot16.c3d	1	1.24681	Queba_day3_trot16.c3d	1	1.21512	31.692	5.41487
-	2	1.34319	-	2	1.2941	49.092	4.10465		-	2	1.30293	-	2	1.24017	62.762	6.08545	Queba_day3_trot21.c3d	1	1.32375	Queba_day3_trot21.c3d	1	1.27431	49.444	6.90083	Queba_day3_trot21.c3d	1	1.24238	Queba_day3_trot21.c3d	1	1.21001	32.373	5.81279
Queba_day3_trot15.c3d	1	1.30246	Queba_day3_trot15.c3d	1	1.25273	49.734	7.17039		Queba_day3_trot15.c3d	1	1.27272	Queba_day3_trot15.c3d	1	1.21855	54.17	7.72267	Queba_day3_trot23.c3d	1	1.3092	Queba_day3_trot23.c3d	1	1.2899	19.299	5.76126	Queba_day3_trot23.c3d	1	1.25864	Queba_day3_trot23.c3d	1	1.2337	24.94	3.96868
Queba_day3_trot16.c3d	1	1.31368	Queba_day3_trot16.c3d	1	1.263	50.686	6.40973		Queba_day3_trot16.c3d	1	1.27694	Queba_day3_trot16.c3d	1	1.22518	51.757	7.22037	Queba_day3_trot24.c3d	1	1.33887	Queba_day3_trot24.c3d	1	1.28598	52.884	6.0478	Queba_day3_trot24.c3d	1	1.25557	Queba_day3_trot24.c3d	1	1.23148	24.089	4.14125
Queba_day3_trot21.c3d	1	1.31234	Queba_day3_trot21.c3d	1	1.25758	54.764	6.81107		Queba_day3_trot21.c3d	1	1.23412	Queba_day3_trot21.c3d	1	1.16666	67.452	11.6517	Queba_day3_trot26.c3d	1	1.33481	Queba_day3_trot26.c3d	1	1.3058	29.013	4.59985	Queba_day3_trot26.c3d	1	1.25971	Queba_day3_trot26.c3d	1	1.24338	16.328	3.21534
Queba_day3_trot23.c3d	1	1.33381	Queba_day3_trot23.c3d	1	1.28809	45.725	4.55022		Queba_day3_trot23.c3d	1	1.29011	Queba_day3_trot23.c3d	1	1.23697	53.137	6.32732	Queba_day3_trot27.c3d	1	1.34053	Queba_day3_trot27.c3d	1	1.29408	46.449	5.45588	Queba_day3_trot27.c3d	1	1.24499	Queba_day3_trot27.c3d	1	1.23	14.99	4.25692
Queba_day3_trot24.c3d	1	1.32997	Queba_day3_trot24.c3d	1	1.2921	37.872	4.25285		Queba_day3_trot24.c3d	1	1.29654	Queba_day3_trot24.c3d	1	1.23927	57.273	6.1533	Queba_day3_trot28.c3d	1	1.32091	Queba_day3_trot28.c3d	1	1.30822	12.691	4.42305	Queba_day3_trot28.c3d	1	1.27779	Queba_day3_trot28.c3d	1	1.23898	38.812	3.55768
Queba_day3_trot26.c3d	1	1.33713	Queba_day3_trot26.c3d	1	1.29562	41.517	3.99246		Queba_day3_trot26.c3d	1	1.27874	Queba_day3_trot26.c3d	1	1.23161	47.133	6.73383	-	2	1.35291	-	2	1.30076	52.146	4.96777	-	2	1.2765	-	2	1.24348	33.022	3.20771
Queba_day3_trot27.c3d	1	1.32569	Queba_day3_trot27.c3d	1	1.27015	55.533	5.87938		Queba_day3_trot27.c3d	1	1.28379	Queba_day3_trot27.c3d	1	1.22221	61.58	7.44513	Queba_day3_trot29.c3d	1	1.34475	Queba_day3_trot29.c3d	1	1.25534	89.4	8.2861	Queba_day3_trot29.c3d	1	1.2237	Queba_day3_trot29.c3d	1	1.18442	39.279	7.8048
-	2	1.31273	-	2	1.27364	39.094	5.62136		-	2	1.28509	-	2	1.23347	51.62	6.59237	Queba_day3_trot6.c3d	1	1.29879	Queba_day3_trot6.c3d	1	1.30548	-6.683	4.62359	Queba_day3_trot6.c3d	1	1.30024	Queba_day3_trot6.c3d	1	1.24711	53.129	2.92477
Queba_day3_trot28.c3d	1	1.33483	Queba_day3_trot28.c3d	1	1.29873	36.101	3.76156		Queba_day3_trot28.c3d	1	1.2913	Queba_day3_trot28.c3d	1	1.24029	51.01	6.07583	Queba_day3_trot7.c3d	1	1.36791	Queba_day3_trot7.c3d	1	1.30337	64.531	4.77709	Queba_day3_trot7.c3d	1	1.28342	Queba_day3_trot7.c3d	1	1.24723	36.187	2.91527
Queba_day3_trot29.c3d	1	1.29538	Queba_day3_trot29.c3d	1	1.25159	43.789	7.25486		Queba_day3_trot29.c3d	1	1.22669	Queba_day3_trot29.c3d	1	1.16669	60.001	11.6495	-	2	1.36397	-	2	1.28974	74.238	5.77361	-	2	1.27346	-	2	1.24263	30.835	3.27388
Queba_day3_trot30.c3d	1	1.28585	Queba_day3_trot30.c3d	1	1.25136	34.495	7.27228		Queba_day3_trot30.c3d	1	1.23377	Queba_day3_trot30.c3d	1	1.1754	58.37	10.99	Queba_Day4_passage10.c3d	1	1.36337	Queba_Day4_passage10.c3d	1	1.33993	23.439	1.53619	Queba_Day4_passage10.c3d	1	1.18361	Queba_Day4_passage10.c3d	1	1.18361	0	8.72809
Queba_day3_trot6.c3d	1	1.34791	Queba_day3_trot6.c3d	1	1.2933	54.607	4.164		Queba_day3_trot6.c3d	1	1.31421	Queba_day3_trot6.c3d	1	1.23154	82.67	6.73898	-	2	1.38066	-	2	1.33356	47.095	2.00392	-	2	1.22569	-	2	1.22149	4.197	5.80665
-	2	1.3529	-	2	1.29462	58.28	4.06641		-	2	1.30277	-	2	1.23233	70.44	6.679	-	3	1.385	-	3	1.3295	55.497	2.30212	-	3	1.22563	-	3	1.18664	38.988	8.49405
Queba_day3_trot7.c3d	1	1.35296	Queba_day3_trot7.c3d	1	1.2922	60.76	4.24596		Queba_day3_trot7.c3d	1	1.29968	Queba_day3_trot7.c3d	1	1.24069	58.982	6.04554	Queba_Day4_piaffe11.c3d	1	1.39961	Queba_Day4_piaffe11.c3d	1	1.31536	84.248	3.34156	Queba_Day4_piaffe11.c3d	1	1.22423	Queba_Day4_piaffe11.c3d	1	1.15868	65.551	10.6504
Queba_Day4_passage10.c3d	1	1.37671	Queba_Day4_passage10.c3d	1	1.31643	60.28	2.38818		Queba_Day4_passage10.c3d	1	1.27771	Queba_Day4_passage10.c3d	1	1.20299	74.726	8.94761	-	2	1.39302	-	2	1.32276	70.267	2.79792	-	2	1.24922	-	2	1.18222	66.997	8.83482
-	2	1.37871	-	2	1.31717	61.541	2.33361		-	2	1.26808	-	2	1.20815	59.932	8.55683									-	3
-	3	1.352	-	3	1.3089	43.101	2.94667		-	3	1.266	-	3	1.20053	65.472	9.13335	-	4	1.40447	-	3	1.33817	66.301	1.66538	-	4	1.21445	-	3	1.20319	11.259	7.21805
Queba_Day4_piaffe11.c3d	1	1.36146	Queba_Day4_piaffe11.c3d	1	1.29556	65.904	3.93603		Queba_Day4_piaffe11.c3d	1	1.28752	Queba_Day4_piaffe11.c3d	1	1.22126	66.264	7.56463	-	5	1.39132	-	4	1.33069	60.636	2.21512	-	5	1.24276	-	4	1.17954	63.222	9.04156
-	2	1.31533	-	2	1.31405	1.276	2.56465		-	2	1.23845	-	2	1.18489	53.557	10.3172	-	8	1.3969	-	5	1.33422	62.675	1.9552	-	6	1.2289	-	5	1.18026	48.635	8.98603
-	3	1.37183	-	3	1.30909	62.739	2.93243		-	3	1.25841	-	3	1.18518	73.228	10.2952	-	9	1.37888	-	6	1.33193	46.954	2.12422	-	7	1.21421	-	6	1.19595	18.262	7.77612
-	4	1.3749	-	4	1.30102	73.879	3.53081		-	4	1.26198	-	4	1.20337	58.61	8.9187	-	10	1.38637	-	7	1.33362	52.754	1.99966	-	8	1.16945	-	7	1.14975	19.701	11.3392
-	5	1.38748	-	5	1.29146	96.021	4.24034		-	5	1.22979	-	5	1.16376	66.035	11.9166	Queba_Day4_piaffe3.c3d	1	1.38619	Queba_Day4_piaffe3.c3d	1	1.34344	42.746	1.27789	Queba_Day4_piaffe3.c3d	1	1.29673	Queba_Day4_piaffe3.c3d	1	1.24464	52.097	4.02178
-	6	1.35248	-	6	1.30271	49.767	3.40557		-	6	1.26033	-	6	1.17837	81.964	10.811	-	2	1.36517	-	2	1.34568	19.487	1.11336	-	2	1.28222	-	2	1.23327	48.954	4.89825
-	7	1.37826	-	7	1.30061	77.657	3.56181		-	7	1.23123	-	7	1.16386	67.366	11.9088	-	3	1.34807	-	3	1.33386	14.219	1.98239	-	3	1.28205	-	3	1.19904	83.016	7.53823
-	8	1.37887	-	8	1.32151	57.357	2.01143		-	8	1.20806	-	8	1.18091	27.14	10.6181	-	4	1.34291	-	4	1.32212	20.788	2.84451	-	4	1.23293	-	4	1.2054	27.526	7.04732
Queba_Day4_piaffe3.c3d	1	1.33999	Queba_Day4_piaffe3.c3d	1	1.33264	7.353	1.18682		Queba_Day4_piaffe3.c3d	1	1.29204	Queba_Day4_piaffe3.c3d	1	1.25692	35.122	4.86557	-	5	1.39028	-	5	1.32846	61.818	2.37877	-	5	1.23751	-	5	1.19413	43.373	7.91624
-	2	1.37613	-	2	1.31753	58.605	2.30706		-	2	1.27201	-	2	1.22668	45.331	7.15394	-	6	1.38332	-	6	1.33572	47.608	1.84556	-	6	1.23303	-	6	1.17817	54.862	9.14712
-	3	1.35152	-	3	1.30275	48.768	3.40253		-	3	1.22855	-	3	1.219	9.543	7.73523	Queba_Day4_piaffe7.c3d	1	1.35262	Queba_Day4_piaffe7.c3d	1	1.33734	15.282	1.7263	Queba_Day4_piaffe7.c3d	1	1.21443	Queba_Day4_piaffe7.c3d	1	1.18905	25.374	8.30805
-	4	1.3128	-	4	1.30188	10.913	3.46712		-	4	1.29134	-	4	1.20206	89.288	9.01792	-	2	1.36008	-	2	1.33052	29.558	2.22717	-	2	1.23261	-	2	1.18122	51.386	8.9117
-	5	1.3574	-	5	1.31091	46.494	2.79778		-	5	1.26872	-	5	1.20538	63.347	8.76664	-	3	1.3744	-	3	1.29597	78.434	4.76657	-	3	1.22078	-	3	1.20367	17.108	7.1805
Queba_Day4_piaffe7.c3d	1	1.37547	Queba_Day4_piaffe7.c3d	1	1.31575	59.716	2.4389		Queba_Day4_piaffe7.c3d	1	1.22601	Queba_Day4_piaffe7.c3d	1	1.20102	24.989	9.09672	tando_passage4.c3d	1	1.23124	tando_passage4.c3d	1	1.17526	55.974	-2.55851	tando_passage4.c3d	1	1.25794	tando_passage4.c3d	1	1.18552	72.418	6.19722
-	2	1.32106	-	2	1.31323	7.826	2.6256		-	2	1.23714	-	2	1.21318	23.961	8.17596	tando_piaffe10.c3d	1	1.18233	tando_piaffe10.c3d	1	1.13302	49.31	1.12728	tando_piaffe10.c3d	1	1.2475	tando_piaffe10.c3d	1	1.2037	43.8	4.75851
tando_piaffe10.c3d	1	1.13996	tando_piaffe10.c3d	1	1.11271	27.255	2.15302		tando_piaffe10.c3d	1	1.27418	tando_piaffe10.c3d	1	1.21391	60.275	8.12109	-	2	1.20334	-	2	1.15	53.341	-0.353857	-	2	1.18275	-	2	1.17983	2.914	6.64712
-	2	1.14855	-	2	1.12029	28.262	1.48664		-	2	1.25606	-	2	1.18962	66.438	7.39184	-	3	1.19459	-	3	1.15371	40.876	-0.677958	-	3	1.22402	-	3	1.17394	50.075	7.11332
																	-	4	1.18931	-	4	1.18482	4.495	-3.39241	-	4	1.22914	-	4	1.1801	49.034	6.62568
-	4	1.16757	-	3	1.12658	40.988	0.933176		-	4	1.21245	-	3	1.19827	14.182	6.71901	tando_piaffe15.c3d	1	1.23165	tando_piaffe15.c3d	1	1.15744	74.203	-1.00363	tando_piaffe15.c3d	1	1.26739	tando_piaffe15.c3d	1	1.21025	57.141	4.24041
tando_piaffe13_2.c3d	1	1.20703	tando_piaffe13_2.c3d	1	1.14895	58.089	-1.03351		tando_piaffe13_2.c3d	1	1.28179	tando_piaffe13_2.c3d	1	1.19351	88.274	7.08925	-	2	1.22606	-	2	1.16771	58.355	-1.89949	-	2	1.25683	-	2	1.1936	63.229	5.5575
tando_piaffe15.c3d	1	1.19782	tando_piaffe15.c3d	1	1.14286	54.96	-0.498597		tando_piaffe15.c3d	1	1.26603	tando_piaffe15.c3d	1	1.2051	60.928	6.18724	tando_piaffe17.c3d	1	1.21218	tando_piaffe17.c3d	1	1.19551	16.678	-4.32509	tando_piaffe17.c3d	1	1.27398	tando_piaffe17.c3d	1	1.20675	67.226	4.5171
-	2	1.21248	-	2	1.14727	65.213	-0.886218		-	2	1.26587	-	2	1.19907	66.8	6.65627
tando_piaffe17.c3d	1	1.20988	tando_piaffe17.c3d	1	1.1557	54.177	-1.62787		tando_piaffe17.c3d	1	1.23204	tando_piaffe17.c3d	1	1.19356	38.475	7.08528	tando_piaffe3.c3d	1	1.24575	tando_piaffe3.c3d	1	1.19289	52.861	-4.0968	tando_piaffe3.c3d	1	1.23132	tando_piaffe3.c3d	1	1.18065	50.664	6.58216
									-	2	1.16071	-	2	1.14872	11.994	10.5764	-	2	1.22346	-	2	1.18853	34.933	-3.71607	-	2	1.24717	-	2	1.20371	43.457	4.75764
tando_piaffe3.c3d	1	1.19818	tando_piaffe3.c3d	1	1.14268	55.505	-0.48224		tando_piaffe3.c3d	1	1.26945	tando_piaffe3.c3d	1	1.19157	77.877	7.24043	-	3	1.24764	-	3	1.19003	57.61	-3.84714	-	5	1.21718	-	3	1.19338	23.808	5.57546
-	2	1.20921	-	2	1.14219	67.025	-0.439152		-	2	1.24548	-	2	1.21133	34.149	5.70241	-	4	1.23985	-	4	1.19333	46.523	-4.13494	-	6	1.19544	-	4	1.16413	31.308	7.88928
-	3	1.19033	-	3	1.1444	45.931	-0.633402		-	3	1.26213	-	3	1.19267	69.458	7.15456	Tando_trot2s.c3d	1	1.15238	Tando_trot2s.c3d	1	1.10773	44.649	3.3342	Tando_trot2s.c3d	1	1.23072	Tando_trot2s.c3d	1	1.19826	32.465	5.18942
-	4	1.18861	-	4	1.1317	56.903	0.482592		-	4	1.21826	-	4	1.17723	41.027	8.35667	Tando_trot3s.c3d	1	1.1297	Tando_trot3s.c3d	1	1.08751	42.186	5.09877	Tando_trot3s.c3d	1	1.24038	Tando_trot3s.c3d	1	1.20139	38.989	4.94105
Tando_trot2s.c3d	1	1.15454	Tando_trot2s.c3d	1	1.11068	43.858	2.33162		Tando_trot2s.c3d	1	1.20135	Tando_trot2s.c3d	1	1.17087	30.488	8.85216	Tando_trot4.c3d	1	1.16139	Tando_trot4.c3d	1	1.11041	50.972	3.10033	Tando_trot4.c3d	1	1.23809	Tando_trot4.c3d	1	1.20377	34.323	4.75305
Tando_trot3s.c3d	1	1.10795	Tando_trot3s.c3d	1	1.0692	38.742	5.97859		Tando_trot3s.c3d	1	1.23308	Tando_trot3s.c3d	1	1.1981	34.978	6.73217	Tando_trot6s.c3d	1	1.16792	Tando_trot6s.c3d	1	1.11698	50.934	2.527	Tando_trot6s.c3d	1	1.24107	Tando_trot6s.c3d	1	1.20453	36.543	4.69331
Tando_trot4.c3d	1	1.15261	Tando_trot4.c3d	1	1.09752	55.084	3.48851		Tando_trot4.c3d	1	1.22733	Tando_trot4.c3d	1	1.19154	35.787	7.24253	-	2	1.16758	-	2	1.12114	46.439	2.16451	-	2	1.24015	-	2	1.19953	40.622	5.08846
Tando_trot6s.c3d	1	1.15376	Tando_trot6s.c3d	1	1.10747	46.285	2.61328		Tando_trot6s.c3d	1	1.23377	Tando_trot6s.c3d	1	1.19698	36.785	6.81889	Tando_trot7s.c3d	1	1.12059	Tando_trot7s.c3d	1	1.08192	38.67	5.58711	Tando_trot7s.c3d	1	1.23216	Tando_trot7s.c3d	1	1.18744	44.721	6.0453
Tando_trot7s.c3d	1	1.12275	Tando_trot7s.c3d	1	1.07334	49.411	5.61523		Tando_trot7s.c3d	1	1.2402	Tando_trot7s.c3d	1	1.20126	38.936	6.48578	Tando_trot8s.c3d	1	1.17628	Tando_trot8s.c3d	1	1.1163	59.984	2.58704	Tando_trot8s.c3d	1	1.24908	Tando_trot8s.c3d	1	1.20997	39.107	4.26225

## Sheet: ABSOLUTE LL
Limb lengths calculated fron ON to MIN change in length
LIMB LENGTH LFON			LIMB LENGTH MIN LF			Change in length (mm)	Dif between min and standing (%)		LIMB LENGTH RHON			LIMB LENGTH MIN RH			Change in length (mm)	Dif between min and standing (%)		LIMB LENGTH RFON			LIMB LENGTH MIN RF			Change in length (mm)	Dif between min and standing (%)		LIMB LENGTH LHON			LIMB LENGTH MIN LH			Change in length (mm)	Dif between min and standing (%)
File	Item	X	File	Item	X				File	Item	X	File	Item	X				File	Item	X	File	Item	X				File	Item	X	File	Item	X
Passage1.c3d	1	1.39464	Passage1.c3d	1	1.28776	106.876	2.81555		Passage1.c3d	1	1.31286	Passage1.c3d	1	1.23584	77.022	6.05951		Passage1.c3d	1	1.41413	Passage1.c3d	1	1.30856	105.563	2.7729		Passage1.c3d	1	1.29683	Passage1.c3d	1	1.21473	82.1	6.12526
Passage3.c3d	1	1.39797	Passage3.c3d	1	1.28118	116.787	3.31191		Passage3.c3d	1	1.3273	Passage3.c3d	1	1.24413	83.172	5.4289		Passage3.c3d	1	1.4128	Passage3.c3d	1	1.29851	114.291	3.52036		Passage3.c3d	1	1.29981	Passage3.c3d	1	1.21125	88.56	6.39381
-	2	1.39233	-	2	1.27751	114.82	3.58895		-	2	1.32162	-	2	1.23051	91.115	6.46451		-	2	1.41176	-	2	1.29989	111.87	3.4176		-	2	1.29633	-	2	1.21341	82.913	6.22665
Passage4.c3d	1	1.38334	Passage4.c3d	1	1.27363	109.712	3.88222		Passage4.c3d	1	1.31243	Passage4.c3d	1	1.20348	108.955	8.51909		Passage4.c3d	1	1.40559	Passage4.c3d	1	1.2906	114.999	4.108		Passage4.c3d	1	1.28451	Passage4.c3d	1	1.17895	105.555	8.88974
-	2	1.38244	-	2	1.26433	118.107	4.58361		-	2	1.30654	-	2	1.20576	100.784	8.346		-	2	1.41721	-	2	1.30489	112.325	3.04632		-	2	1.29384	-	2	1.21315	80.692	6.24698
Trot6.c3d	1	1.39344	Trot6.c3d	1	1.28561	107.824	2.97758		Trot6.c3d	1	1.334	Trot6.c3d	1	1.24707	86.931	5.20595		Trot6.c3d	1	1.42428	Trot6.c3d	1	1.29821	126.068	3.54198		Trot6.c3d	1	1.32919	Trot6.c3d	1	1.23208	97.106	4.78382
-	2	1.39763	-	2	1.28178	115.857	3.26723		-	2	1.33528	-	2	1.24968	85.599	5.00695		Trot7.c3d	1	1.42389	Trot7.c3d	1	1.30202	121.869	3.25882		Trot7.c3d	1	1.32979	Trot7.c3d	1	1.23394	95.852	4.64054
Trot7.c3d	1	1.39173	Trot7.c3d	1	1.28243	109.303	3.21787		Trot7.c3d	1	1.33556	Trot7.c3d	1	1.24962	85.944	5.01181		Queba_day2_piaffe3.c3d	1	1.43126	Queba_day2_piaffe3.c3d	1	1.28894	142.319	5.19724		Queba_day2_piaffe3.c3d	1	1.34172	Queba_day2_piaffe3.c3d	1	1.23361	108.11	6.27374
-	2	1.39516	-	2	1.28354	111.62	3.13373		-	2	1.34018	-	2	1.25731	82.873	4.42719		-	2	1.43609	-	2	1.29138	144.704	5.01793		-	2	1.34515	-	2	1.22505	120.098	6.92418
Queba_day2_piaffe3.c3d	1	1.42556	Queba_day2_piaffe3.c3d	1	1.29173	133.83	4.15179		Queba_day2_piaffe3.c3d	1	1.33125	Queba_day2_piaffe3.c3d	1	1.2148	116.45	8.08142		Queba_day2_piaffe44.c3d	1	1.4218	Queba_day2_piaffe44.c3d	1	1.29292	128.877	4.90459		Queba_day2_piaffe44.c3d	1	1.34943	Queba_day2_piaffe44.c3d	1	1.23991	109.517	5.79493
Queba_day2_piaffe44.c3d	1	1.41952	Queba_day2_piaffe44.c3d	1	1.29297	126.547	4.05985		Queba_day2_piaffe44.c3d	1	1.34399	Queba_day2_piaffe44.c3d	1	1.22255	121.442	7.49456		Queba_day2_piaffe45.c3d	1	1.40849	Queba_day2_piaffe45.c3d	1	1.28499	123.5	5.48777		Queba_day2_piaffe45.c3d	1	1.27726	Queba_day2_piaffe45.c3d	1	1.18211	95.143	10.1864
Queba_day2_piaffe45.c3d	1	1.37569	Queba_day2_piaffe45.c3d	1	1.27497	100.72	5.39562		Queba_day2_piaffe45.c3d	1	1.30363	Queba_day2_piaffe45.c3d	1	1.1776	126.032	10.896		Queba_day2_piaffe46.c3d	1	1.42192	Queba_day2_piaffe46.c3d	1	1.29305	128.874	4.89525		Queba_day2_piaffe46.c3d	1	1.32891	Queba_day2_piaffe46.c3d	1	1.2281	100.812	6.69261
Queba_day2_piaffe47.c3d	1	1.38783	Queba_day2_piaffe47.c3d	1	1.25065	137.173	7.19983		Queba_day2_piaffe47.c3d	1	1.30887	Queba_day2_piaffe47.c3d	1	1.18792	120.945	10.1146		Queba_day2_piaffe47.c3d	1	1.40984	Queba_day2_piaffe47.c3d	1	1.25888	150.961	7.40862		Queba_day2_piaffe47.c3d	1	1.29799	Queba_day2_piaffe47.c3d	1	1.1936	104.389	9.31336
Queba_day2_piaffe49.c3d	1	1.41731	Queba_day2_piaffe49.c3d	1	1.29438	122.932	3.9556		Queba_day2_piaffe49.c3d	1	1.34494	Queba_day2_piaffe49.c3d	1	1.22541	119.523	7.278		Queba_day2_piaffe49.c3d	1	1.42584	Queba_day2_piaffe49.c3d	1	1.29608	129.76	4.67261		Queba_day2_piaffe49.c3d	1	1.34751	Queba_day2_piaffe49.c3d	1	1.24867	98.84	5.12983
Queba_day2_piaffe50.c3d	1	1.41526	Queba_day2_piaffe50.c3d	1	1.29332	121.942	4.03395		Queba_day2_piaffe50.c3d	1	1.31262	Queba_day2_piaffe50.c3d	1	1.20178	110.84	9.06652		-	2	1.42352	-	2	1.2962	127.325	4.66349		-	2	1.35066	-	2	1.25132	99.337	4.92826
-	2	1.41265	-	2	1.28163	131.025	4.90159		-	2	1.34089	-	2	1.22437	116.518	7.35707		Queba_day2_piaffe50.c3d	1	1.41216	Queba_day2_piaffe50.c3d	1	1.288	124.156	5.26668		Queba_day2_piaffe50.c3d	1	1.348	Queba_day2_piaffe50.c3d	1	1.25117	96.827	4.93973
Queba_day2_piaffe51.c3d	1	1.38514	Queba_day2_piaffe51.c3d	1	1.267	118.136	5.98686		Queba_day2_piaffe51.c3d	1	1.33462	Queba_day2_piaffe51.c3d	1	1.19711	137.507	9.4192		Queba_day2_piaffe51.c3d	1	1.39047	Queba_day2_piaffe51.c3d	1	1.26216	128.309	7.16738		Queba_day2_piaffe51.c3d	1	1.31587	Queba_day2_piaffe51.c3d	1	1.20141	114.452	8.71983
Queba_day2_piaffe55.c3d	1	1.39053	Queba_day2_piaffe55.c3d	1	1.26172	128.804	6.37842		Queba_day2_piaffe55.c3d	1	1.32673	Queba_day2_piaffe55.c3d	1	1.18609	140.636	10.2532		Queba_day2_piaffe53.c3d	1	1.38996	Queba_day2_piaffe53.c3d	1	1.25383	136.125	7.77983		Queba_day2_piaffe53.c3d	1	1.31738	Queba_day2_piaffe53.c3d	1	1.20212	115.261	8.66634
Queba_day2_piaffe56.c3d	1	1.39711	Queba_day2_piaffe56.c3d	1	1.269	128.105	5.83846		Queba_day2_piaffe56.c3d	1	1.32682	Queba_day2_piaffe56.c3d	1	1.193	133.822	9.73041		Queba_day2_piaffe55.c3d	1	1.38529	Queba_day2_piaffe55.c3d	1	1.249	136.291	8.13479		Queba_day2_piaffe55.c3d	1	1.30257	Queba_day2_piaffe55.c3d	1	1.17406	128.507	10.7981
Queba_day2_piaffe6.c3d	1	1.42174	Queba_day2_piaffe6.c3d	1	1.28335	138.384	4.77359		Queba_day2_piaffe6.c3d	1	1.33544	Queba_day2_piaffe6.c3d	1	1.20617	129.273	8.73397		Queba_day2_piaffe56.c3d	1	1.39753	Queba_day2_piaffe56.c3d	1	1.25904	138.485	7.39634		Queba_day2_piaffe56.c3d	1	1.29555	Queba_day2_piaffe56.c3d	1	1.19311	102.438	9.35097
Queba_day2_piaffe7.c3d	1	1.42939	Queba_day2_piaffe7.c3d	1	1.29276	136.631	4.07573		Queba_day2_piaffe7.c3d	1	1.33079	Queba_day2_piaffe7.c3d	1	1.2226	108.189	7.49062		Queba_day2_piaffe6.c3d	1	1.43041	Queba_day2_piaffe6.c3d	1	1.29056	139.847	5.07817		Queba_day2_piaffe6.c3d	1	1.33405	Queba_day2_piaffe6.c3d	1	1.22817	105.88	6.68706
-	2	1.43224	-	2	1.29208	140.164	4.12596		-	2	1.33888	-	2	1.23105	107.83	6.8514		Queba_day2_piaffe7.c3d	1	1.43461	Queba_day2_piaffe7.c3d	1	1.2847	149.912	5.50947		Queba_day2_piaffe7.c3d	1	1.33753	Queba_day2_piaffe7.c3d	1	1.22352	114.013	7.04043
Quemacho_day2_walk10.c3d	1	1.33791	Quemacho_day2_walk10.c3d	1	1.32977	8.14	1.00552		Quemacho_day2_walk10.c3d	1	1.20591	Quemacho_day2_walk10.c3d	1	1.20591	0	7.27291		-	2	1.42503	-	2	1.29662	128.414	4.63674		-	2	1.33021	-	2	1.23041	99.804	6.51717
Quemacho_day2_walk12.c3d	1	1.38728	Quemacho_day2_walk12.c3d	1	1.27936	107.916	4.75835		Quemacho_day2_walk12.c3d	1	1.33506	Quemacho_day2_walk12.c3d	1	1.23459	100.477	5.06821		Quemacho_day2_walk10.c3d	1	1.32932	Quemacho_day2_walk10.c3d	1	1.3439	-14.578	1.15926		Quemacho_day2_walk10.c3d	1	1.267	Quemacho_day2_walk10.c3d	1	1.23403	32.968	4.94028
Quemacho_day2_walk42.c3d	1	1.34963	Quemacho_day2_walk42.c3d	1	1.31805	31.573	1.87816		Quemacho_day2_walk42.c3d	1	1.25336	Quemacho_day2_walk42.c3d	1	1.22459	28.769	5.83661		-	2	1.33677	-	2	1.3447	-7.927	1.10042		-	2	1.24731	-	2	1.20586	41.448	7.11027
-	2	1.32462	-	2	1.3152	9.417	2.09026		-	2	1.25873	-	2	1.24114	17.593	4.56417		Quemacho_day2_walk12.c3d	1	1.40431	Quemacho_day2_walk12.c3d	1	1.29113	113.189	5.04066		Quemacho_day2_walk12.c3d	1	1.33962	Quemacho_day2_walk12.c3d	1	1.23359	106.03	4.97441
Quemacho_day2_walk49.c3d	1								Quemacho_day2_walk49.c3d	1	1.32961	Quemacho_day2_walk49.c3d	1	1.222	107.614	6.03623											Quemacho_day2_walk42.c3d	1	1.29922	Quemacho_day2_walk42.c3d	1	1.23272	66.494	5.0412
Quemacho_day2_walk50.c3d	1								Quemacho_day2_walk50.c3d	1	1.31766	Quemacho_day2_walk50.c3d	1	1.20178	115.888	7.59117											-	2	1.28686	-	2	1.23695	49.907	4.71512
Quemacho_day3_trot29.c3d	1	1.39374	Quemacho_day3_trot29.c3d	1	1.27374	119.996	4.63355		Quemacho_day3_trot29.c3d	1	1.33967	Quemacho_day3_trot29.c3d	1	1.24587	93.8	4.2007					Quemacho_day2_walk49.c3d	1					Quemacho_day2_walk49.c3d	1	1.30794	Quemacho_day2_walk49.c3d	1	1.1948	113.139	7.96255
-	2	1.39378	-	2	1.27375	120.035	4.6331		-	2	1.34311	-	2	1.24216	100.946	4.93697											Quemacho_day2_walk50.c3d	1	1.3027	Quemacho_day2_walk50.c3d	1	1.16751	135.19	10.0644
Quemacho_day3_trot31.c3d	1	1.38147	Quemacho_day3_trot31.c3d	1	1.27236	109.111	4.73717		Quemacho_day3_trot31.c3d	1	1.3355	Quemacho_day3_trot31.c3d	1	1.24293	92.572	4.87812		Quemacho_day3_trot29.c3d	1	1.4044	Quemacho_day3_trot29.c3d	1	1.28119	123.209	4.94085		Quemacho_day3_trot29.c3d	1	1.32976	Quemacho_day3_trot29.c3d	1	1.22406	105.694	5.98565
-	2	1.38718	-	2	1.27401	113.178	4.61386		-	2	1.34357	-	2	1.24376	99.814	4.81475		Quemacho_day3_trot31.c3d	1	1.40121	Quemacho_day3_trot31.c3d	1	1.28347	117.739	4.77206		Quemacho_day3_trot31.c3d	1	1.3242	Quemacho_day3_trot31.c3d	1	1.22385	100.353	6.00239
Quemacho_day3_trot37.c3d	1	1.39727	Quemacho_day3_trot37.c3d	1	1.27132	125.945	4.81481		Quemacho_day3_trot37.c3d	1	1.33952	Quemacho_day3_trot37.c3d	1	1.23741	102.103	5.30026		Quemacho_day3_trot37.c3d	1	1.39981	Quemacho_day3_trot37.c3d	1	1.28226	117.547	4.86131		Quemacho_day3_trot37.c3d	1	1.33274	Quemacho_day3_trot37.c3d	1	1.22335	109.387	6.04041
-	2	1.40152	-	2	1.27402	127.5	4.61273		-	2	1.33739	-	2	1.24135	96.034	4.99873		Quemacho_day3_trot40.c3d	1	1.40947	Quemacho_day3_trot40.c3d	1	1.28401	125.46	4.73169		Quemacho_day3_trot40.c3d	1	1.32968	Quemacho_day3_trot40.c3d	1	1.2275	102.187	5.72205
Quemacho_day3_trot40.c3d	1	1.39969	Quemacho_day3_trot40.c3d	1	1.28234	117.346	3.98958		Quemacho_day3_trot40.c3d	1	1.33742	Quemacho_day3_trot40.c3d	1	1.24623	91.188	4.62557		Quemacho_day3_trot42.c3d	1	1.40477	Quemacho_day3_trot42.c3d	1	1.28494	119.837	4.66299		Quemacho_day3_trot42.c3d	1	1.33103	Quemacho_day3_trot42.c3d	1	1.22319	107.842	6.05285
-	2	1.40264	-	2	1.27597	126.675	4.46711		-	2	1.33721	-	2	1.24222	94.984	4.93215		-	2	1.40458	-	2	1.28123	123.354	4.93825		-	2	1.32921	-	2	1.23204	97.169	5.37336
Quemacho_day3_trot42.c3d	1	1.40076	Quemacho_day3_trot42.c3d	1	1.27177	128.994	4.78149		Quemacho_day3_trot42.c3d	1	1.33534	Quemacho_day3_trot42.c3d	1	1.24166	93.677	4.97508		Quemacho_day3_trot43.c3d	1	1.40384	Quemacho_day3_trot43.c3d	1	1.28838	115.46	4.40768		Quemacho_day3_trot43.c3d	1	1.32329	Quemacho_day3_trot43.c3d	1	1.22587	97.426	5.84732
Quemacho_day3_trot43.c3d	1	1.38887	Quemacho_day3_trot43.c3d	1	1.28291	105.959	3.9469		Quemacho_day3_trot43.c3d	1	1.34322	Quemacho_day3_trot43.c3d	1	1.2467	96.516	4.58975		-	2	1.40492	-	2	1.28783	117.09	4.44819		-	2	1.32289	-	2	1.22686	96.031	5.77105
-	2	1.39495	-	2	1.28144	113.506	4.05696		-	2	1.34286	-	2	1.24795	94.911	4.49409		Queba_day3_trot12.c3d	1	1.44098	Queba_day3_trot12.c3d	1	1.30358	137.402	3.2799		Queba_day3_trot12.c3d	1	1.35232	Queba_day3_trot12.c3d	1	1.24726	105.062	4.57064
Queba_day3_trot12.c3d	1	1.43097	Queba_day3_trot12.c3d	1	1.29885	132.12	3.85156		Queba_day3_trot12.c3d	1	1.34655	Queba_day3_trot12.c3d	1	1.2345	112.047	6.68039		Queba_day3_trot13.c3d	1	1.45044	Queba_day3_trot13.c3d	1	1.30194	148.495	4.90686		Queba_day3_trot13.c3d	1	1.35776	Queba_day3_trot13.c3d	1	1.23926	118.498	5.18219
-	2	1.4333	-	2	1.29358	139.718	4.24168		-	2	1.35016	-	2	1.22639	123.771	7.29375		Queba_day3_trot14.c3d	1	1.44249	Queba_day3_trot14.c3d	1	1.31067	131.817	4.26966		Queba_day3_trot14.c3d	1	1.34448	Queba_day3_trot14.c3d	1	1.24937	95.117	4.40912
Queba_day3_trot13.c3d	1	1.41784	Queba_day3_trot13.c3d	1	1.28993	127.912	4.5118		Queba_day3_trot13.c3d	1	1.34046	Queba_day3_trot13.c3d	1	1.23165	108.81	6.8956		Queba_day3_trot15.c3d	1	1.42095	Queba_day3_trot15.c3d	1	1.2886	132.354	5.88171		Queba_day3_trot15.c3d	1	1.31304	Queba_day3_trot15.c3d	1	1.20797	105.065	7.57646
Queba_day3_trot14.c3d	1	1.42717	Queba_day3_trot14.c3d	1	1.30228	124.885	3.59743		Queba_day3_trot14.c3d	1	1.35548	Queba_day3_trot14.c3d	1	1.23519	120.295	6.62838		Queba_day3_trot16.c3d	1	1.4192	Queba_day3_trot16.c3d	1	1.30005	119.147	5.04519		Queba_day3_trot16.c3d	1	1.3298	Queba_day3_trot16.c3d	1	1.21512	114.682	7.02941
-	2	1.41582	-	2	1.29529	120.533	4.11554		-	2	1.3547	-	2	1.24027	114.431	6.24437		Queba_day3_trot21.c3d	1	1.40319	Queba_day3_trot21.c3d	1	1.28281	120.377	6.30425		Queba_day3_trot21.c3d	1	1.3239	Queba_day3_trot21.c3d	1	1.2127	111.2	7.21449
Queba_day3_trot15.c3d	1	1.38124	Queba_day3_trot15.c3d	1	1.28238	98.856	5.07084		Queba_day3_trot15.c3d	1	1.3511	Queba_day3_trot15.c3d	1	1.22007	131.031	7.77127		Queba_day3_trot23.c3d	1	1.43388	Queba_day3_trot23.c3d	1	1.297	136.876	5.26789		Queba_day3_trot23.c3d	1	1.34306	Queba_day3_trot23.c3d	1	1.23412	108.934	5.57554
Queba_day3_trot16.c3d	1	1.40608	Queba_day3_trot16.c3d	1	1.27847	127.614	5.36043		Queba_day3_trot16.c3d	1	1.34042	Queba_day3_trot16.c3d	1	1.22625	114.174	7.30403		Queba_day3_trot24.c3d	1	1.43295	Queba_day3_trot24.c3d	1	1.29997	132.973	5.05082		Queba_day3_trot24.c3d	1	1.34052	Queba_day3_trot24.c3d	1	1.23152	108.999	5.77431
Queba_day3_trot21.c3d	1	1.39149	Queba_day3_trot21.c3d	1	1.28404	107.451	4.94825		Queba_day3_trot21.c3d	1	1.30273	Queba_day3_trot21.c3d	1	1.17094	131.782	11.4847		Queba_day3_trot26.c3d	1	1.41278	Queba_day3_trot26.c3d	1	1.30939	103.39	4.36301		Queba_day3_trot26.c3d	1	1.34416	Queba_day3_trot26.c3d	1	1.24364	100.524	4.84761
Queba_day3_trot23.c3d	1	1.41932	Queba_day3_trot23.c3d	1	1.29612	123.194	4.05343		Queba_day3_trot23.c3d	1	1.34839	Queba_day3_trot23.c3d	1	1.2392	109.199	6.3254		Queba_day3_trot27.c3d	1	1.42385	Queba_day3_trot27.c3d	1	1.29743	126.42	5.2367		Queba_day3_trot27.c3d	1	1.3304	Queba_day3_trot27.c3d	1	1.23001	100.394	5.89038
Queba_day3_trot24.c3d	1	1.41999	Queba_day3_trot24.c3d	1	1.29226	127.737	4.33976		Queba_day3_trot24.c3d	1	1.34974	Queba_day3_trot24.c3d	1	1.2421	107.643	6.10596		Queba_day3_trot28.c3d	1	1.4283	Queba_day3_trot28.c3d	1	1.30945	118.855	4.35862		Queba_day3_trot28.c3d	1	1.3505	Queba_day3_trot28.c3d	1	1.23899	111.513	5.20323
Queba_day3_trot26.c3d	1	1.42617	Queba_day3_trot26.c3d	1	1.30045	125.712	3.73282		Queba_day3_trot26.c3d	1	1.34268	Queba_day3_trot26.c3d	1	1.23205	110.624	6.86529		-	2	1.43419	-	2	1.30251	131.684	4.86566		-	2	1.35023	-	2	1.24424	105.989	4.80147
Queba_day3_trot27.c3d	1	1.40792	Queba_day3_trot27.c3d	1	1.28607	121.849	4.79754		Queba_day3_trot27.c3d	1	1.34145	Queba_day3_trot27.c3d	1	1.226	115.446	7.32286		Queba_day3_trot29.c3d	1	1.40779	Queba_day3_trot29.c3d	1	1.27149	136.294	7.13105		Queba_day3_trot29.c3d	1	1.30314	Queba_day3_trot29.c3d	1	1.18606	117.076	9.25275
-	2	1.39227	-	2	1.2817	110.574	5.12147		-	2	1.34244	-	2	1.23563	106.804	6.59467		Queba_day3_trot6.c3d	1	1.44001	Queba_day3_trot6.c3d	1	1.30821	131.796	4.44919		Queba_day3_trot6.c3d	1	1.35376	Queba_day3_trot6.c3d	1	1.24718	106.581	4.57683
Queba_day3_trot28.c3d	1	1.41853	Queba_day3_trot28.c3d	1	1.29974	118.784	3.78546		Queba_day3_trot28.c3d	1	1.34655	Queba_day3_trot28.c3d	1	1.24064	105.912	6.2164		Queba_day3_trot7.c3d	1	1.45191	Queba_day3_trot7.c3d	1	1.30915	142.764	4.38068		Queba_day3_trot7.c3d	1	1.34685	Queba_day3_trot7.c3d	1	1.24723	99.616	4.5724
Queba_day3_trot29.c3d	1	1.38696	Queba_day3_trot29.c3d	1	1.26093	126.025	6.65832		Queba_day3_trot29.c3d	1	1.31252	Queba_day3_trot29.c3d	1	1.16837	144.157	11.6795		-	2	1.43837	-	2	1.29977	138.597	5.06528		-	2	1.34612	-	2	1.24366	102.461	4.84562
Queba_day3_trot30.c3d	1	1.4042	Queba_day3_trot30.c3d	1	1.26677	137.434	6.2266		Queba_day3_trot30.c3d	1	1.3123	Queba_day3_trot30.c3d	1	1.17747	134.825	10.9912		Queba_Day4_passage10.c3d	1	1.38072	Queba_Day4_passage10.c3d	1	1.34052	40.199	2.08929		Queba_Day4_passage10.c3d	1	1.21279	Queba_Day4_passage10.c3d	1	1.21279	0	7.30178
Queba_day3_trot6.c3d	1	1.42687	Queba_day3_trot6.c3d	1	1.29461	132.261	4.16521		Queba_day3_trot6.c3d	1	1.34679	Queba_day3_trot6.c3d	1	1.23278	114.006	6.81033		-	2	1.38624	-	2	1.33415	52.096	2.55484		-	2	1.23691	-	2	1.22784	9.072	6.15207
-	2	1.42583	-	2	1.29545	130.375	4.10317		-	2	1.35223	-	2	1.23241	119.818	6.83845		-	3	1.37584	-	3	1.32968	46.158	2.88082		-	3	1.24427	-	3	1.20035	43.921	8.25315
Queba_day3_trot7.c3d	1	1.42745	Queba_day3_trot7.c3d	1	1.29595	131.497	4.06638		Queba_day3_trot7.c3d	1	1.35226	Queba_day3_trot7.c3d	1	1.24091	111.344	6.41117		Queba_Day4_piaffe11.c3d	1	1.39458	Queba_Day4_piaffe11.c3d	1	1.31536	79.217	3.92681		Queba_Day4_piaffe11.c3d	1	1.2484	Queba_Day4_piaffe11.c3d	1	1.16684	81.562	10.8141
Queba_Day4_passage10.c3d	1	1.37708	Queba_Day4_passage10.c3d	1	1.31711	59.97	2.49372		Queba_Day4_passage10.c3d	1	1.28974	Queba_Day4_passage10.c3d	1	1.21336	76.386	8.48934		-	2	1.39916	-	2	1.32464	74.52	3.24945		-	2	1.27479	-	2	1.18955	85.238	9.07856
-	2	1.37892	-	2	1.31717	61.749	2.48927		-	2	1.28785	-	2	1.21979	68.062	8.00462												3
-	3	1.35268	-	3	1.30893	43.746	3.09892		-	3	1.28072	-	3	1.20744	73.288	8.93605		-	4	1.39273	-	3	1.33846	54.267	1.77947		-	4	1.25873	-	3	1.22635	32.379	6.26534
Queba_Day4_piaffe11.c3d	1	1.36399	Queba_Day4_piaffe11.c3d	1	1.29754	66.445	3.9422		Queba_Day4_piaffe11.c3d	1	1.30812	Queba_Day4_piaffe11.c3d	1	1.22958	78.545	7.26627		-	5	1.40077	-	4	1.33082	69.952	2.3407		-	5	1.25287	-	4	1.18217	70.703	9.64249
-	2	1.33015	-	2	1.31425	15.895	2.70507		-	2	1.25967	-	2	1.19201	67.66	10.0995		-	8	1.37888	-	5	1.33521	43.677	2.01847		-	6	1.24397	-	5	1.18772	56.251	9.21851
-	3	1.37365	-	3	1.30941	64.238	3.06397		-	3	1.2809	-	3	1.19596	84.938	9.80164		-	9	1.38639	-	6	1.33213	54.255	2.24398		-	7	1.23305	-	6	1.20687	26.18	7.7545
-	4	1.37602	-	4	1.30104	74.976	3.68331		-	4	1.28476	-	4	1.21836	66.402	8.11225		-	10	1.38636	-	7	1.33364	52.72	2.1331		-	8	1.21012	-	7	1.17102	39.096	10.4946
-	5	1.38925	-	5	1.29155	97.7	4.38608		-	5	1.26145	-	5	1.18081	80.638	10.9441		Queba_Day4_piaffe3.c3d	1	1.36651	Queba_Day4_piaffe3.c3d	1	1.34345	23.059	1.4135		Queba_Day4_piaffe3.c3d	1	1.30259	Queba_Day4_piaffe3.c3d	1	1.24831	54.274	4.58701
-	6	1.35315	-	6	1.30272	50.427	3.55879		-	6	1.28902	-	6	1.19693	92.09	9.72863		-	2	1.35365	-	2	1.3458	7.846	1.24098		-	2	1.29621	-	2	1.23779	58.426	5.39133
-	7	1.37852	-	7	1.30063	77.884	3.71344		-	7	1.26129	-	7	1.18395	77.339	10.7075		-	3	1.34448	-	3	1.33401	10.477	2.10639		-	3	1.29377	-	3	1.20183	91.945	8.13988
-	8	1.3795	-	8	1.32246	57.036	2.09743		-	8	1.23755	-	8	1.19918	38.377	9.55909		-	4	1.39048	-	4	1.32225	68.232	2.9693		-	4	1.25286	-	4	1.2113	41.562	7.41598
Queba_Day4_piaffe3.c3d	1	1.34422	Queba_Day4_piaffe3.c3d	1	1.33264	11.582	1.34425		Queba_Day4_piaffe3.c3d	1	1.30912	Queba_Day4_piaffe3.c3d	1	1.25738	51.743	5.16939		-	5	1.38492	-	5	1.32972	55.198	2.42098		-	5	1.26729	-	5	1.20662	60.667	7.77369
-	2	1.37952	-	2	1.31787	61.647	2.43731		-	2	1.30784	-	2	1.24688	60.954	5.96099		-	6	1.36448	-	6	1.33588	28.6	1.96909		-	6	1.24989	-	6	1.18017	69.712	9.79497
-	3	1.3552	-	3	1.30293	52.279	3.54384		-	3	1.27252	-	3	1.24085	31.662	6.41577		Queba_Day4_piaffe7.c3d	1	1.36044	Queba_Day4_piaffe7.c3d	1	1.33855	21.893	1.77294		Queba_Day4_piaffe7.c3d	1	1.24238	Queba_Day4_piaffe7.c3d	1	1.20685	35.532	7.75588
-	4	1.32369	-	4	1.30189	21.798	3.62031		-	4	1.31451	-	4	1.20943	105.086	8.78589		-	2	1.37558	-	2	1.33057	45.01	2.35883		-	2	1.25363	-	2	1.18974	63.895	9.06396
-	5	1.36059	-	5	1.31147	49.118	2.91117		-	5	1.27997	-	5	1.21226	67.702	8.572		-	3	1.29659	-	3	1.29659	0	4.85224		-	3	1.234	-	3	1.20642	27.586	7.78905
Queba_Day4_piaffe7.c3d	1	1.37549	Queba_Day4_piaffe7.c3d	1	1.31675	58.738	2.52007		Queba_Day4_piaffe7.c3d	1	1.25293	Queba_Day4_piaffe7.c3d	1	1.21568	37.257	8.31445		tando_passage4.c3d	1	1.25416	tando_passage4.c3d	1	1.17533	78.834	13.751		tando_passage4.c3d	1	1.31597	tando_passage4.c3d	1	1.19471	121.259	5.50048
-	2	1.3232	-	2	1.3139	9.305	2.73158		-	2	1.26469	-	2	1.23039	34.305	7.20526		tando_piaffe10.c3d	1	1.18243	tando_piaffe10.c3d	1	1.13822	44.212	16.4738		tando_piaffe10.c3d	1	1.27262	tando_piaffe10.c3d	1	1.2145	58.123	3.93584
tando_piaffe10.c3d	1	1.14865	tando_piaffe10.c3d	1	1.11318	35.47	2.40733		tando_piaffe10.c3d	1	1.30341	tando_piaffe10.c3d	1	1.23048	72.931	7.19824		-	2	1.20512	-	2	1.15027	54.851	-0.160131		-	2	1.23106	-	2	1.18365	47.408	6.37538
-	2	1.16072	-	2	1.12031	40.405	1.78224		-	2	1.29793	-	2	1.20502	92.912	6.58465		-	3	1.20104	-	3	1.15481	46.23	-0.555278					-	3	1.17883	-1178.83	6.75703
																		-	4	1.18963	-	4	1.18482	4.813	-3.1684		-	4	1.25102	-	4	1.19044	60.584	5.83878
-	4	1.17258	-	3	1.12661	45.979	1.23062		-	4	1.24549	-	3	1.20664	38.856	6.45906		tando_piaffe15.c3d	1	1.26428	tando_piaffe15.c3d	1	1.15977	104.511	-0.986823		tando_piaffe15.c3d	1	1.31253	tando_piaffe15.c3d	1	1.21046	102.075	4.25532
tando_piaffe13_2.c3d	1	1.22847	tando_piaffe13_2.c3d	1	1.15019	78.278	-0.83716		tando_piaffe13_2.c3d	1	1.32327	tando_piaffe13_2.c3d	1	1.19914	124.131	7.04017		-	2	1.25573	-	2	1.16987	85.865	-1.86646		-	2	1.30025	-	2	1.19393	106.325	5.56273
tando_piaffe15.c3d	1	1.2411	tando_piaffe15.c3d	1	1.14287	98.236	-0.194978		tando_piaffe15.c3d	1	1.31675	tando_piaffe15.c3d	1	1.20522	111.525	6.56868		tando_piaffe17.c3d	1	1.21382	tando_piaffe17.c3d	1	1.20481	9.004	-4.9093		tando_piaffe17.c3d	1	1.30402	tando_piaffe17.c3d	1	1.21969	84.332	3.52469
-	2	1.2414	-	2	1.14749	93.916	-0.599925		-	2	1.30022	-	2	1.19947	100.752	7.01451
tando_piaffe17.c3d	1	1.20989	tando_piaffe17.c3d	1	1.15783	52.054	-1.50713		tando_piaffe17.c3d	1	1.27462	tando_piaffe17.c3d	1	1.21517	59.448	5.79772		tando_piaffe3.c3d	1	1.24746	tando_piaffe3.c3d	1	1.20101	46.456	-4.57772		tando_piaffe3.c3d	1	1.2589	tando_piaffe3.c3d	1	1.19011	68.791	5.86472
			-	2	1.17543	-1175.43	-3.04977		-	2	1.24691	-	2	1.2045	42.41	6.62457		-	2	1.22615	-	2	1.19803	28.119	-4.31849		-	2	1.27294	-	2	1.21026	62.687	4.27114
tando_piaffe3.c3d	1	1.19833	tando_piaffe3.c3d	1	1.15418	44.154	-1.18679		tando_piaffe3.c3d	1	1.29238	tando_piaffe3.c3d	1	1.20011	92.27	6.96474		-	3	1.2489	-	3	1.20161	47.297	-4.63014		-	5	1.26835	-	3	1.20583	62.519	4.62154
-	2	1.20925	-	2	1.14896	60.292	-0.729326		-	2	1.28842	-	2	1.22701	61.408	4.87971		-	4	1.24333	-	4	1.20304	40.287	-4.75535		-	6	1.23359	-	4	1.18784	45.749	6.04412
-	3	1.19036	-	3	1.15258	37.784	-1.04652		-	3	1.29708	-	3	1.20845	88.635	6.31875		Tando_trot2s.c3d	1	1.20833	Tando_trot2s.c3d	1	1.11023	98.108	3.32679		Tando_trot2s.c3d	1	1.32423	Tando_trot2s.c3d	1	1.19846	125.775	5.20433
-	4	1.1921	-	4	1.14506	47.034	-0.387676		-	4	1.26226	-	4	1.20649	55.771	6.47077		Tando_trot3s.c3d	1	1.19919	Tando_trot3s.c3d	1	1.0889	110.296	5.18419		Tando_trot3s.c3d	1	1.32455	Tando_trot3s.c3d	1	1.20141	123.136	4.97092
Tando_trot2s.c3d	1	1.20724	Tando_trot2s.c3d	1	1.11125	95.991	2.57679		Tando_trot2s.c3d	1	1.31843	Tando_trot2s.c3d	1	1.17129	147.143	9.19931		Tando_trot4.c3d	1	1.2229	Tando_trot4.c3d	1	1.11605	106.85	2.8201		Tando_trot4.c3d	1	1.324	Tando_trot4.c3d	1	1.20543	118.573	4.65286
Tando_trot3s.c3d	1	1.19064	Tando_trot3s.c3d	1	1.07099	119.656	6.10647		Tando_trot3s.c3d	1	1.33444	Tando_trot3s.c3d	1	1.19992	134.521	6.97962		Tando_trot6s.c3d	1	1.21948	Tando_trot6s.c3d	1	1.12509	94.39	2.03277		Tando_trot6s.c3d	1	1.32658	Tando_trot6s.c3d	1	1.20581	120.778	4.6232
Tando_trot4.c3d	1	1.20463	Tando_trot4.c3d	1	1.10894	95.69	2.77931		Tando_trot4.c3d	1	1.32843	Tando_trot4.c3d	1	1.1934	135.031	7.48491		-	2	1.22547	-	2	1.1277	97.773	1.80524		-	2	1.3256	-	2	1.19982	125.775	5.09644
Tando_trot6s.c3d	1	1.21701	Tando_trot6s.c3d	1	1.11292	104.095	2.43056		Tando_trot6s.c3d	1	1.33028	Tando_trot6s.c3d	1	1.19908	131.201	7.04466		Tando_trot7s.c3d	1	1.1869	Tando_trot7s.c3d	1	1.08839	98.512	5.22817		Tando_trot7s.c3d	1	1.31287	Tando_trot7s.c3d	1	1.18744	125.432	6.07584
Tando_trot7s.c3d	1	1.19294	Tando_trot7s.c3d	1	1.07503	117.91	5.75255		Tando_trot7s.c3d	1	1.33838	Tando_trot7s.c3d	1	1.2025	135.883	6.77962		Tando_trot8s.c3d	1	1.22756	Tando_trot8s.c3d	1	1.12615	101.418	1.94064		Tando_trot8s.c3d	1	1.33355	Tando_trot8s.c3d	1	1.21365	119.899	4.00291

[truncated: 7 more sheets: Import QQ, Import T, Cost graph, Collisions Graphs, GRF Graphs, Height Graphs, Footfall timings]
